# Supplementary material
Source: MDPI journal article supplement (https://www.mdpi.com/2073-4395/11/5/995)
Supplement: s1 [file s1]

Archive with 11 entries (11 files):
- Figure S1 - defined groups of rice.pdf
- Figure S2 - allele frequency.pdf
- Figure S3 - genetic distance heatmap.pdf
- Figure S4 - Correlation Fst and latitude.pdf
- Figure S5 - Correlation Fst and elavation.pdf
- Figure S6 - Correlation Fst and temperature.pdf
- Figure S7 - Correlation Fst and rainfall.pdf
- Table S1 - List of rice accession.xlsx
- Table S2 - 72 acc of 3K.xlsx
- Table S3 - List of 102 SNP markers.xlsx
- Table S4 - Rice informations_groups.xlsx
