# Supplementary material
Source: MDPI journal article supplement (https://www.mdpi.com/2073-4395/11/5/995)
Supplement: s1 [file s1 › Figure S1 - defined groups of rice.pdf]

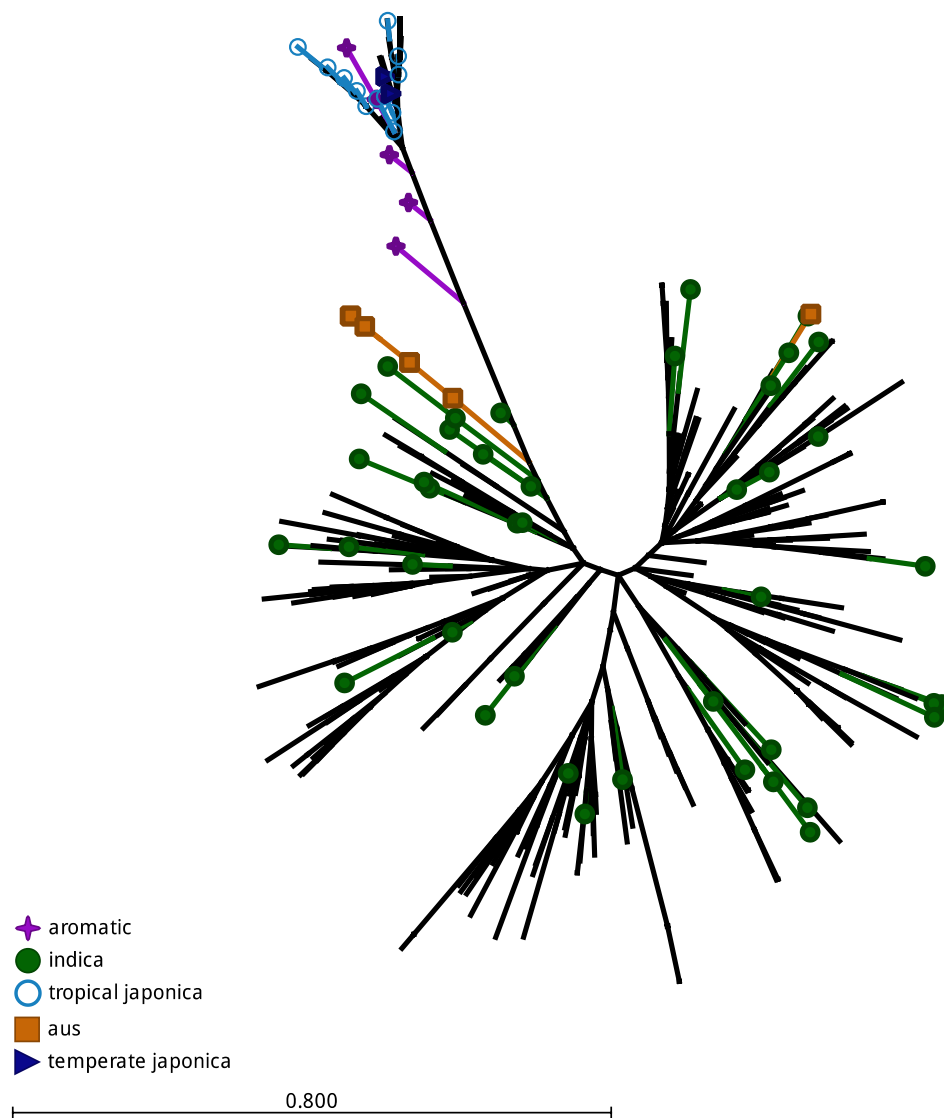

Figure S1: The maximum-likelihood tree of the 72 representative of 3000 rice genomes (highlighted in different colors) and the 365 Thai landrace accessions.
