# Supplementary material
Source: MDPI journal article supplement (https://www.mdpi.com/2073-4395/11/5/995)
Supplement: s1 [file s1 › Figure S3 - genetic distance heatmap.pdf]

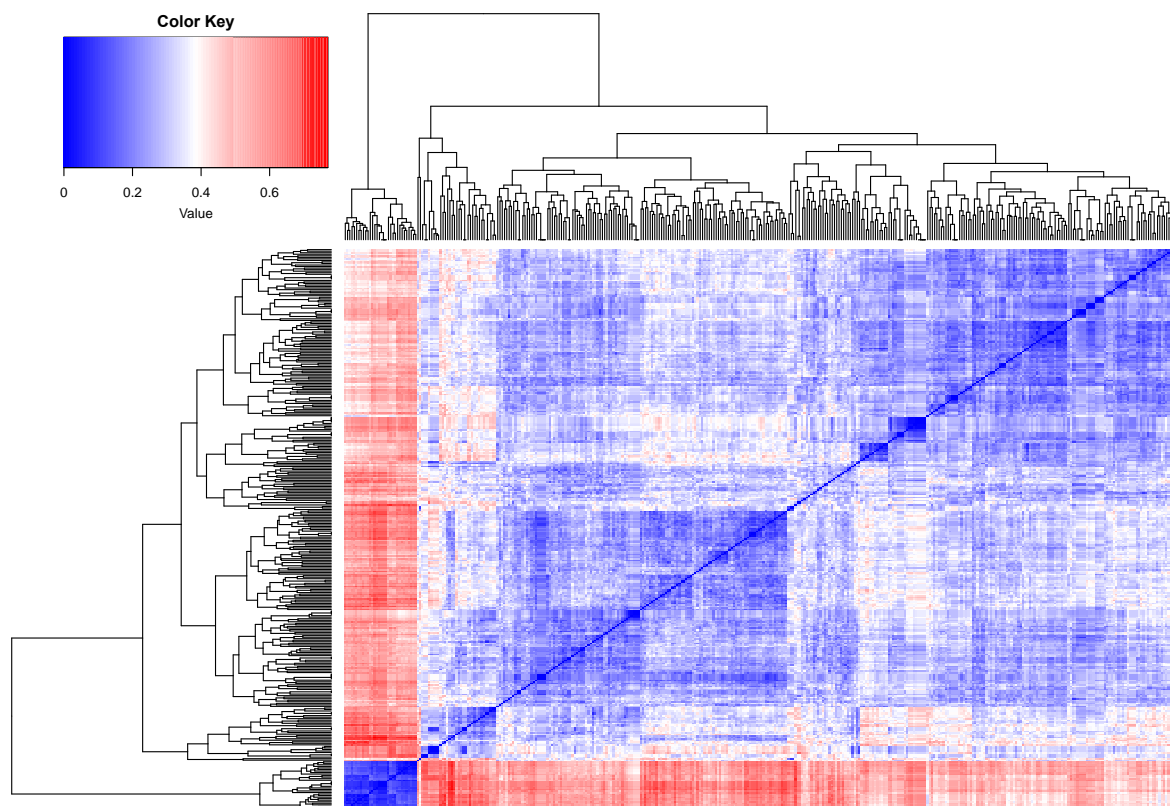

Figure S3: Heatmap hierarchical clustering of the genetic distance calculated based on the dissimilarity matrix of 365 rice accessions
