# Supplementary material
Source: MDPI journal article supplement (https://www.mdpi.com/2073-4395/11/5/995)
Supplement: s1 [file s1 › Figure S5 - Correlation Fst and elavation.pdf]

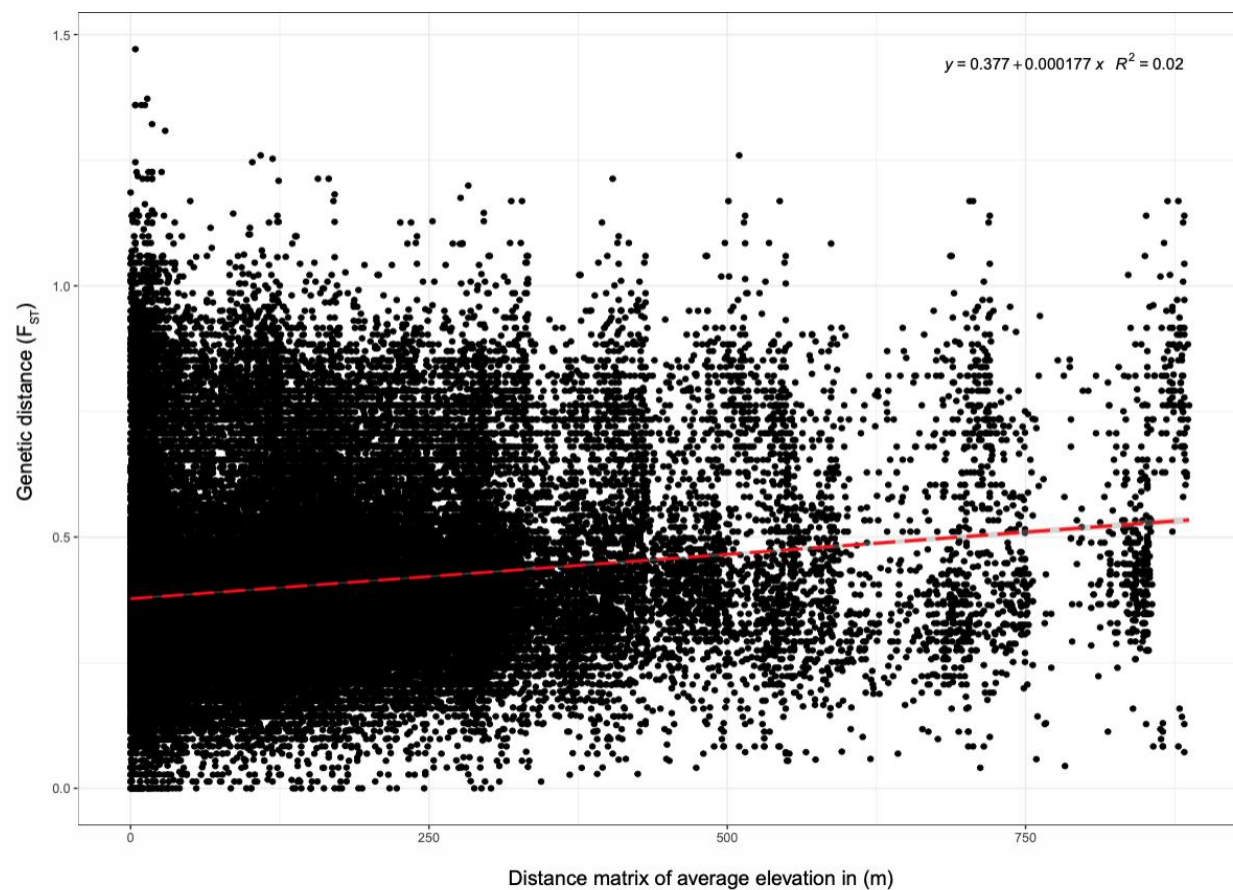

**Figure S5.** Correlation of the pairwise elevation difference (in meters) and genetic distance (pairwise  $F_{ST}$ ) among the 365 rice accessions.
