# Supplementary material
Source: MDPI journal article supplement (https://www.mdpi.com/2073-4395/11/5/995)
Supplement: s1 [file s1 › Figure S7 - Correlation Fst and rainfall.pdf]

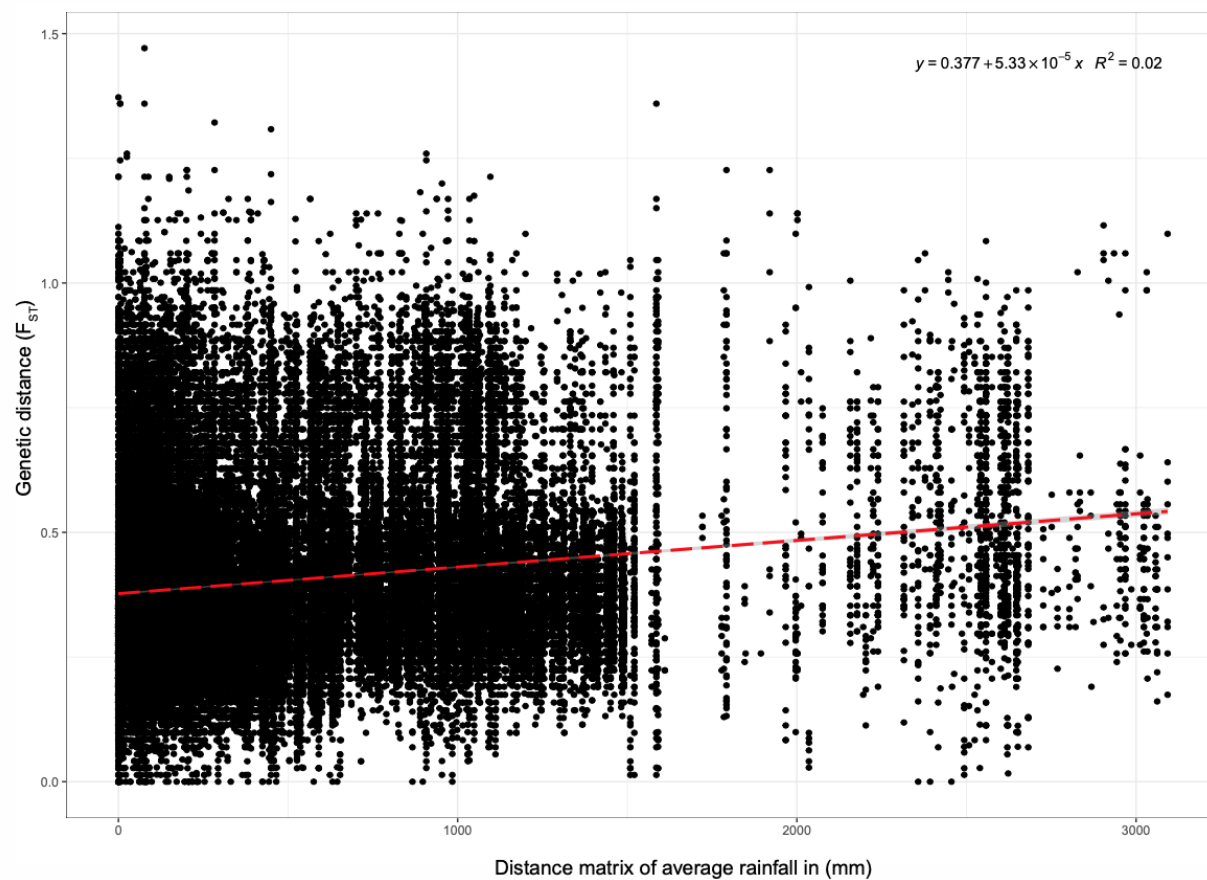

**Figure S7.** Correlation of the pairwise difference of average rainfall in a year (in millimeters) and genetic distance (pairwise  $F_{ST}$ ) among the 365 rice accessions.
