# Supplementary material
Source: MDPI journal article supplement (https://www.mdpi.com/2073-4395/11/5/995)
Supplement: s1 [file s1 › Table S1 - List of rice accession.xlsx]

## Sheet: Sheet1
Table S1. List of rice accessions used in the study
Code	GS.Number	Name	Type	Ecosystem	Region	District	Province	Latitude	Longitude	Average Temp (°C)	Average rainfall (mm)	Elevation (m)
LC01	788	Khao Sa-ong	Non-glutinous	Lowland rice	Central	Khok Samrong	Lopburi	15.1331	100.643	28.2	1125.1	41
LC02	798	Khao Puang	Non-glutinous	Lowland rice	Central	Mueang	Phra Nakhon Si Ayutthaya	14.3252	100.518	28	1082.4	4
LC03	1626	Khao' Hawm	Non-glutinous	Lowland rice	Central	Mueang	Ang Thong	14.6237	100.408	29	1100	5
LC04	1628	Hawm Tang	Non-glutinous	Lowland rice	Central	Mueang	Ang Thong	14.6175	100.479	29	1100	8
LC05	1629	Hawm Tang	Non-glutinous	Lowland rice	Central	Mueang	Ang Thong	14.6025	100.486	29	1100	8
LC06	1751	Leuang Hawm	Non-glutinous	Lowland rice	Central	Mueang	Suphan Buri	14.5763	99.9207	28.1	975.4	15
LC07	2018	Hawm India	Non-glutinous	Lowland rice	Central	Mueang	Chai Nat	15.1096	100.078	27.8	1010.8	17
LC08	2747	Hawm Mali	Non-glutinous	Lowland rice	Central	Taphan Hin	Phichit	16.204	100.371	28.1	1264.8	31
LC09	2751	Khao' Hawm	Non-glutinous	Lowland rice	Central	Mueang	Ang Thong	14.5463	100.457	29	1100	7
LC10	3683	Khao Cha-wat	Non-glutinous	Lowland rice	Central	Hankha	Chai Nat	15.12	99.8312	27.8	1010.8	85.5
LC11	3686	Tah Pi	Non-glutinous	Lowland rice	Central	Hankha	Chai Nat	15.0562	99.9132	27.8	1010.8	46
LC12	3688	Khao Sa-wat	Non-glutinous	Lowland rice	Central	Hankha	Chai Nat	15.0119	99.9621	27.8	1010.8	17
LC13	6155	Khao Tah Haeng	Non-glutinous	Lowland rice	Central	Sam Khok	Pathum Thani	14.1014	100.442	29	1300	5
LC14	6162	Khao Gaew	Non-glutinous	Lowland rice	Central	Sam Khok	Pathum Thani	14.0833	100.545	29	1300	5
LC15	6426	Hawm Mali	Non-glutinous	Lowland rice	Central	Khlong Luang	Pathum Thani	14.1389	100.746	29	1300	5
LC16	6444	Leuang Hawm	Non-glutinous	Lowland rice	Central	Nong Suea	Pathum Thani	14.0594	100.761	29	1300	5
LC17	6455	Leuang Tia	Non-glutinous	Lowland rice	Central	Nong Suea	Pathum Thani	14.1419	100.794	29	1300	6
LC18	6465	Leuang Hawm	Non-glutinous	Lowland rice	Central	Mueang	Uthai Thani	15.4268	99.9922	27	1150	30
LC19	6480	Bow Hawm	Non-glutinous	Lowland rice	Central	Wat Sing	Chai Nat	15.1539	99.88	27.8	1010.8	52
LC20	6515	Nahng Yuan	Non-glutinous	Lowland rice	Central	Hankha	Chai Nat	14.9378	100.009	27.8	1010.8	14
LC21	6517	Bang Ga-pi	Glutinous	Lowland rice	Central	Hankha	Chai Nat	15.0035	100.053	27.8	1010.8	15
LC22	6543	Gaen Taeng	Glutinous	Lowland rice	Central	Ban Mi	Lopburi	15.0785	100.575	28.2	1125.1	15
LC23	6887	Nahng Pa-yah	Non-glutinous	Lowland rice	Central	Mueang	Suphan Buri	14.5323	99.9795	28.1	975.4	9
LC24	9169	Khao Luang	Non-glutinous	Lowland rice	Central	Sankhaburi	Chai Nat	14.9629	100.151	27.8	1010.8	15
LC25	9554	Leuang Ra haeng	Non-glutinous	Lowland rice	Central	Mueang	Nakhon Pathom	13.9311	99.9428	29	1006.1	11
LC26	9559	Leuang Tawng Kam	Non-glutinous	Lowland rice	Central	Mueang	Nakhon Pathom	13.8835	100.007	29	1006.1	8
LC27	9565	Khao E-jiak	Non-glutinous	Lowland rice	Central	Mueang	Nakhon Pathom	13.8909	100.079	29	1006.1	7
LC28	9574	Leuang Pra-tew	Non-glutinous	Lowland rice	Central	Kamphaeng Saen	Nakhon Pathom	14.1237	100.033	29	1006.1	6
LC29	9578	Leuang	Non-glutinous	Lowland rice	Central	Kamphaeng Saen	Nakhon Pathom	13.9252	100.01	29	1006.1	9
LC30	9583	Khao Gaw Diaw	Non-glutinous	Lowland rice	Central	Song Phi Nong	Suphan Buri	14.1355	99.8227	28.1	975.4	15
LC31	9598	Khao Set-ti	Non-glutinous	Lowland rice	Central	Mueang	Nakhon Pathom	13.8528	100.124	29	1006.1	6
LC32	10775	Khao Luang	Non-glutinous	Lowland rice	Central	Mueang	Samut Prakan	13.5311	100.692	28.4	1200	2
LC33	10858	Luang Pra-than Tia	Non-glutinous	Lowland rice	Central	Wang Sai Phun	Phichit	16.37	100.557	28.1	1264.8	52
LC34	11427	Leuang Awn	Non-glutinous	Lowland rice	Central	Ban Rai	Uthai Thani	15.2212	99.4352	27	1150	222
LC35	14474	Khao Sa-mer	Non-glutinous	Lowland rice	Central	Don Tum	Nakhon Pathom	13.9386	100.141	29	1006.1	4
LC36	14484	Leuang Nuan	Non-glutinous	Lowland rice	Central	Nakhon Chai Si	Nakhon Pathom	13.8587	100.245	29	1006.1	5
LC37	15954	Di Si	Non-glutinous	Lowland rice	Central	Mueang	Chai Nat	15.1816	100.115	27.8	1010.8	20
LC38	15957	Leuang Roi Et	Non-glutinous	Lowland rice	Central	Mueang	Chai Nat	15.1871	100.169	27.8	1010.8	17
LC39	15971	Leuang Tawng	Non-glutinous	Lowland rice	Central	Mueang	Chai Nat	15.226	100.126	27.8	1010.8	18
LC40	15974	Hah Ruang Bow	Non-glutinous	Lowland rice	Central	Mueang	Chai Nat	15.2629	100.108	27.8	1010.8	19
LC41	18203	Nahng Dam	Non-glutinous	Lowland rice	Central	Pho Thong	Ang Thong	14.6718	100.342	29	1100	9
LC42	19860	Puang Pa-yawm	Non-glutinous	Lowland rice	Central	Wat Sing	Chai Nat	15.2486	100.021	27.8	1010.8	22
LC43	20960	Khao Pra-guad	Non-glutinous	Lowland rice	Central	Nakhon Luang	Phra Nakhon Si Ayutthaya	14.475	100.652	28	1082.4	7
LC44	20987	Khao Tah Haeng Rang Si	Non-glutinous	Lowland rice	Central	Ban Mi	Lopburi	14.965	100.511	28.2	1125.1	13
LC45	21347	Leuang Pin Gaew	Non-glutinous	Lowland rice	Central	Song Phi Nong	Suphan Buri	14.1922	100.026	28.1	975.4	6
LC46	21920	Khao Sa-ahd	Non-glutinous	Lowland rice	Central	Tha Luang	Lopburi	15.0552	101.197	28.2	1125.1	111
LC47	22041	Hawm Gu-lahb	Non-glutinous	Lowland rice	Central	Mueang	Chai Nat	15.2355	100.177	27.8	1010.8	17
LC48	22042	Hawm Ta-krai	Non-glutinous	Lowland rice	Central	Mueang	Chai Nat	15.2156	100.274	27.8	1010.8	16
LC49	22043	Pin Gaew Bow	Non-glutinous	Lowland rice	Central	Khok Samrong	Lopburi	14.9779	100.808	28.2	1125.1	68
LN01	137	Pah Leuad Kwai	Glutinous	Lowland rice	Northern	San Pa Tong	Chiang Mai	18.6581	98.832	25.8	1100	332
LN02	143	Daw E-hen	Glutinous	Lowland rice	Northern	San Pa Tong	Chiang Mai	18.6616	98.8882	25.8	1100	301
LN03	155	Nahng Pim Pah	Glutinous	Lowland rice	Northern	San Pa Tong	Chiang Mai	18.5707	98.8944	25.8	1100	290
LN04	158	Gaew Piang	Glutinous	Lowland rice	Northern	San Pa Tong	Chiang Mai	18.6247	98.9141	25.8	1100	296
LN05	168	Pah Piang	Glutinous	Lowland rice	Northern	San Pa Tong	Chiang Mai	18.6611	98.8857	25.8	1100	301
LN06	215	Leuang Pin Tawng	Non-glutinous	Lowland rice	Northern	San Pa Tong	Chiang Mai	18.5234	98.8767	25.8	1100	287
LN07	231	Hawm Tu-rian	Non-glutinous	Lowland rice	Northern	San Pa Tong	Chiang Mai	18.5635	98.8924	25.8	1100	290
LN08	238	Lampang	Non-glutinous	Lowland rice	Northern	San Pa Tong	Chiang Mai	18.5933	98.8974	25.8	1100	296
LN09	239	Leuang Awn	Non-glutinous	Lowland rice	Northern	San Pa Tong	Chiang Mai	18.6214	98.9034	25.8	1100	296
LN10	243	Khao Leb	Non-glutinous	Lowland rice	Northern	San Pa Tong	Chiang Mai	18.6337	98.907	25.8	1100	301
LN11	249	Leuang Awn	Non-glutinous	Lowland rice	Northern	San Pa Tong	Chiang Mai	18.6422	98.914	25.8	1100	301
LN12	257	Mae Ped	Non-glutinous	Lowland rice	Northern	San Pa Tong	Chiang Mai	18.6523	98.8951	25.8	1100	301
LN13	259	Sa-mer Jai	Non-glutinous	Lowland rice	Northern	San Pa Tong	Chiang Mai	18.6616	98.888	25.8	1100	301
LN14	334	Khao Jan	Non-glutinous	Lowland rice	Northern	San Pa Tong	Chiang Mai	18.6533	98.878	25.8	1100	301
LN15	337	Niaw Leuad Raed	Glutinous	Lowland rice	Northern	San Pa Tong	Chiang Mai	18.6444	98.875	25.8	1100	311
LN16	1409	Gaew	Glutinous	Lowland rice	Northern	Mueang	Lampang	18.5201	99.468	26.4	1045.5	307
LN17	1411	Wang Hin	Glutinous	Lowland rice	Northern	Mueang	Lampang	18.4816	99.465	26.4	1045.5	317
LN18	1412	Gahb Sahng	Glutinous	Lowland rice	Northern	Mueang	Lampang	18.4366	99.4301	26.4	1045.5	273
LN19	1413	Jao Hawm	Non-glutinous	Lowland rice	Northern	Mueang	Lampang	18.4043	99.5161	26.4	1045.5	273
LN20	1418	Daw Dawk Prao	Glutinous	Lowland rice	Northern	Mueang	Lampang	18.3745	99.5421	26.4	1045.5	246
LN21	1424	Leb Chang	Glutinous	Lowland rice	Northern	Mueang	Lampang	18.4283	99.6247	26.4	1045.5	271
LN22	1425	Nahng Nuan	Glutinous	Lowland rice	Northern	Mueang	Lampang	18.4921	99.6149	26.4	1045.5	303.5
LN23	1433	Gaew Noi	Non-glutinous	Lowland rice	Northern	Mueang	Lampang	18.4532	99.6749	26.4	1045.5	378
LN24	1438	Mon	Glutinous	Lowland rice	Northern	Mueang	Lampang	18.2616	99.4899	26.4	1045.5	235
LN25	1439	Gow Nam Pueng	Non-glutinous	Lowland rice	Northern	Mueang	Lampang	18.2856	99.4551	26.4	1045.5	230
LN26	1442	Nam Pak Good	Glutinous	Lowland rice	Northern	Mueang	Lampang	18.3308	99.4902	26.4	1045.5	241
LN27	1443	Taeng Awn	Glutinous	Lowland rice	Northern	Mueang	Lampang	18.4077	99.5166	26.4	1045.5	273
LN28	1446	Niaw Sahm Pew	Glutinous	Lowland rice	Northern	Mueang	Lampang	18.4263	99.5499	26.4	1045.5	296
LN29	1448	Man Tun	Glutinous	Lowland rice	Northern	Mueang	Lampang	18.348	99.4421	26.4	1045.5	250
LN30	1449	Feuang Leuang	Glutinous	Lowland rice	Northern	Mueang	Lampang	18.3949	99.488	26.4	1045.5	287
LN31	1451	Gah Long	Non-glutinous	Lowland rice	Northern	Mueang	Lampang	18.3133	99.4972	26.4	1045.5	241
LN32	1454	Lang Gai Mon	Glutinous	Lowland rice	Northern	Mueang	Lampang	18.4246	99.6001	26.4	1045.5	271
LN33	1455	Lang Gow Lae	Glutinous	Lowland rice	Northern	Mueang	Lampang	18.4435	99.6744	26.4	1045.5	378
LN34	1458	Gahb Gaew	Glutinous	Lowland rice	Northern	Mueang	Lampang	18.4209	99.6141	26.4	1045.5	271
LN35	1468	Daw Nok Gaen	Glutinous	Lowland rice	Northern	Mueang	Lampang	18.3686	99.5765	26.4	1045.5	246
LN36	1471	Wi	Non-glutinous	Lowland rice	Northern	Mueang	Lampang	18.3574	99.5984	26.4	1045.5	282
LN37	1473	Dawk Pud Yahng	Glutinous	Lowland rice	Northern	Mueang	Lampang	18.3456	99.5639	26.4	1045.5	246
LN38	1484	Niaw San-pah-tawng	Glutinous	Lowland rice	Northern	Mueang	Lampang	18.324	99.5402	26.4	1045.5	241
LN39	1487	Ma-tan	Glutinous	Lowland rice	Northern	Mueang	Lampang	18.3331	99.5167	26.4	1045.5	241
LN40	2120	Lai Lah	Glutinous	Lowland rice	Northern	San Pa Tong	Chiang Mai	18.6383	98.8666	25.8	1100	311
LN41	2934	Leb Pay	Non-glutinous	Lowland rice	Northern	San Pa Tong	Chiang Mai	18.6182	98.8503	25.8	1100	301
LN42	3101	Daw Mah-na	Glutinous	Lowland rice	Northern	San Pa Tong	Chiang Mai	18.6015	98.8466	25.8	1100	301
LN43	3105	Khae-maew	Non-glutinous	Lowland rice	Northern	Khun Yuam	Mae Hong Son	18.8505	97.9362	25.5	1100	594
LN44	3131	Leuang Hawm	Glutinous	Lowland rice	Northern	Phan	Chiang Rai	19.5637	99.7833	24.4	1690.5	405
LN45	3134	Khao' Ti	Glutinous	Lowland rice	Northern	Mae Suai	Chiang Rai	19.6076	99.4827	24.4	1690.5	474
LN46	3141	Mae Hahng	Glutinous	Lowland rice	Northern	Mueang	Lampang	18.3467	99.525	26.4	1045.5	254
LN47	3167	Lai Luang	Glutinous	Lowland rice	Northern	Wiang Sa	Nan	18.5632	100.771	25.9	1234.1	190
LN48	3173	Ma-hah Wong	Glutinous	Lowland rice	Northern	Pua	Nan	19.1713	100.814	25.9	1234.1	294.5
LN49	3177	Pah Gong Noi	Glutinous	Lowland rice	Northern	Pua	Nan	19.0043	100.935	25.9	1234.1	332
LN50	3178	Daw Hawm	Glutinous	Lowland rice	Northern	Pua	Nan	19.2432	100.929	25.9	1234.1	318
LNE01	605	Nahng Tom	Non-glutinous	Lowland rice	Northeastern	Mueang	Surin	15.0944	103.489	27.1	1432.2	144
LNE02	607	Niaw Khao	Non-glutinous	Lowland rice	Northeastern	Mueang	Surin	14.9699	103.492	27.1	1432.2	143
LNE03	622	Niaw San-pah-tawng	Glutinous	Lowland rice	Northeastern	Mueang	Surin	14.8365	103.558	27.1	1432.2	153
LNE04	2720	Khi Tom Hawm	Glutinous	Lowland rice	Northeastern	Det Udom	Ubon Ratchathani	14.872	105.025	27.2	1581.7	142
LNE05	3210	Hawm Pa-mah	Glutinous	Lowland rice	Northeastern	Wang Saphung	Loei	17.1534	101.948	25.7	1240.9	354
LNE06	3247	Gaen Jan	Glutinous	Lowland rice	Northeastern	Non Sa-at	Udon Thani	17.0642	102.75	26.8	1418.4	336
LNE07	3248	E-Tawd	Glutinous	Lowland rice	Northeastern	Non Sa-at	Udon Thani	17.0392	102.789	26.8	1418.4	220
LNE08	3249	Leuang Tawng	Non-glutinous	Lowland rice	Northeastern	Non Sa-at	Udon Thani	16.9941	102.835	26.8	1418.4	205
LNE09	3255	E-Long Mah	Glutinous	Lowland rice	Northeastern	Non Sa-at	Udon Thani	16.8939	102.971	26.8	1418.4	213
LNE10	3268	Goo Kam	Glutinous	Lowland rice	Northeastern	Kantharawichai	Maha Sarakham	16.3594	103.241	27.1	1201.9	154
LNE11	3269	Daw Hawm	Glutinous	Lowland rice	Northeastern	Kantharawichai	Maha Sarakham	16.2122	103.186	27.1	1201.9	146
LNE12	3270	Hawm Nahng Nuan	Glutinous	Lowland rice	Northeastern	Yang Talat	Kalasin	16.4428	103.219	26.4	1500	162
LNE13	3327	E-Pun	Glutinous	Lowland rice	Northeastern	Mancha Khiri	Khon Kaen	16.2198	102.552	26.9	1246.8	200
LNE14	3358	Khao Gung	Glutinous	Lowland rice	Northeastern	Mueang	Ubon Ratchathani	15.3357	104.849	27.2	1581.7	132
LNE15	3361	Khao	Glutinous	Lowland rice	Northeastern	Muang Sam Sip	Ubon Ratchathani	15.5281	104.725	27.2	1581.7	133
LNE16	3366	Khao Set-ti	Glutinous	Lowland rice	Northeastern	Phibun Mangsahan	Ubon Ratchathani	15.1127	105.205	27.2	1581.7	141
LNE17	3369	Khao' Gam	Glutinous	Lowland rice	Northeastern		Ubon Ratchathani
LNE18	4068	Hawm Meud	Glutinous	Lowland rice	Northeastern	Phang Khon	Sakon Nakhon	17.3903	103.743	26.2	1645	167
LNE19	4087	Hawm Ka-set	Glutinous	Lowland rice	Northeastern	Yang Talat	Kalasin	16.4047	103.226	26.4	1500	156
LNE20	4489	Niaw Hawm Mali	Glutinous	Lowland rice	Northeastern	Nong Han	Udon Thani	17.3694	103.085	26.8	1418.4	174
LNE21	4496	Niaw Loi	Glutinous	Lowland rice	Northeastern	Nong Han	Udon Thani	17.46	103.113	26.8	1418.4	173
LNE22	4813	Khao' Hawm	Non-glutinous	Lowland rice	Northeastern	Prakhon Chai	Buriram	14.646	103.035	27	1193.9	167
LNE23	4819	Khao' Hawm	Non-glutinous	Lowland rice	Northeastern	Borabue	Maha Sarakham	16.016	103.108	27.1	1201.9	182
LNE24	4842	Khao' Hawm	Non-glutinous	Lowland rice	Northeastern	Mueang	Roi Et	16.0469	103.61	26.9	1342	155
LNE25	5601	E-Dahng	Glutinous	Lowland rice	Northeastern	Kut Khaopun	Ubon Ratchathani	15.8587	105.023	27.2	1581.7	165
LNE26	5624	Hawm Tung	Glutinous	Lowland rice	Northeastern	Khueang Nai	Ubon Ratchathani	15.4045	104.529	27.2	1581.7	123
LNE27	5648	Daw Daeng	Non-glutinous	Lowland rice	Northeastern	Kham Khuean Kaeo	Yasothon	15.6613	104.332	26.9	1342	127
LNE28	5671	Khao Gung	Glutinous	Lowland rice	Northeastern	Maha Chana Chai	Yasothon	15.5097	104.235	26.9	1342	129
LNE29	5729	Nahng Nuan	Glutinous	Lowland rice	Northeastern	Chonnabot	Khon Kaen	16.0209	102.549	26.9	1246.8	189
LNE30	5808	Leuang Awn	Non-glutinous	Lowland rice	Northeastern	Non Thai	Nakhon Ratchasima	15.1047	102.053	27	1034.7	176
LNE31	5826	Khao Mali	Non-glutinous	Lowland rice	Northeastern	Bamnet Narong	Chaiyaphum	15.4693	101.674	27	1118	212
LNE34	7613	Hahng Yi 71	Glutinous	Lowland rice	Northeastern	Mueang	Nakhon Phanom	17.356	104.625	26.1	2346.8	158
LNE35	7627	Khi Tom Kam-nan	Glutinous	Lowland rice	Northeastern	Yang Talat	Kalasin	16.427	103.32	26.4	1500	154
LNE36	7655	Hawm Pah Sew	Glutinous	Lowland rice	Northeastern	Huai Mek	Kalasin	16.5726	103.328	26.4	1500	177
LNE37	7672	Hawm Phae Pa-lo	Glutinous	Lowland rice	Northeastern	Huai Mek	Kalasin	16.624	103.212	26.4	1500	181
LNE38	7971	Khao Nak	Non-glutinous	Lowland rice	Northeastern	Chok Chai	Nakhon Ratchasima	14.871	102.24	27	1034.7	186
LNE39	7983	Leuang Lai	Non-glutinous	Lowland rice	Northeastern	Khon Buri	Nakhon Ratchasima	14.4496	102.198	27	1034.7	292
LNE40	7997	Bak-muay	Glutinous	Lowland rice	Northeastern	Chatturat	Chaiyaphum	15.6856	101.792	27	1118	207
LNE41	10669	Daeng Luang	Glutinous	Lowland rice	Northeastern	Mueang	Mukdahan	16.6206	104.582	26.4	1480	162
LNE42	10670	Khao' Pa-mah	Glutinous	Lowland rice	Northeastern	Khamcha-I	Mukdahan	16.6185	104.381	26.4	1480	185
LNE43	10677	Pra-in	Glutinous	Lowland rice	Northeastern	Dong Luang	Mukdahan	16.8281	104.128	26.4	1480	322.5
LNE44	10684	Khao Gung	Glutinous	Lowland rice	Northeastern	Nikhom Kham Soi	Mukdahan	16.2532	104.62	26.4	1480	191
LNE45	10689	Ma-ue	Glutinous	Lowland rice	Northeastern	Dong Luang	Mukdahan	16.8622	104.216	26.4	1480	242
LNE46	10693	E-Gaw	Glutinous	Lowland rice	Northeastern	Dong Luang	Mukdahan	16.8219	104.274	26.4	1480	261.5
LNE47	12154	Dawk Rim	Glutinous	Lowland rice	Northeastern	Kut Chum	Yasothon	16.134	104.184	26.9	1342	172
LNE48	12155	Daw Khao	Glutinous	Lowland rice	Northeastern	Kut Chum	Yasothon	15.9627	104.375	26.9	1342	161
LNE49	12498	Leuang Gahng	Non-glutinous	Lowland rice	Northeastern	Phu Khiao	Chaiyaphum	16.3551	102.144	27	1118	214
LNE50	13996	Maeng Dan	Glutinous	Lowland rice	Northeastern	Mueang	Mukdahan	16.4672	104.687	26.4	1480	163
LS01	1765	Hawm Jan	Non-glutinous	Lowland rice	Southern	Khao Chaison	Phatthalung	7.44966	100.079	28.1	2071.8	24
LS02	1769	Toon	Non-glutinous	Lowland rice	Southern	Khao Chaison	Phatthalung	7.48025	100.083	28.1	2071.8	21
LS03	1770	Sai Khao	Non-glutinous	Lowland rice	Southern	Khuan Khanun	Phatthalung	7.85228	99.9872	28.1	2071.8	15
LS04	4105	Daeng Chai Ta-lay	Non-glutinous	Lowland rice	Southern	Mueang	Phatthalung	7.71943	100.102	28.1	2071.8	2
LS05	4145	Nahng Gai	Non-glutinous	Lowland rice	Southern	Mueang	Phatthalung	7.68937	100.072	28.1	2071.8	7
LS06	4175	Sai Khao	Non-glutinous	Lowland rice	Southern	Khao Chaison	Phatthalung	7.46679	100.106	28.1	2071.8	15
LS07	4198	Nawn Hak	Non-glutinous	Lowland rice	Southern	Khao Chaison	Phatthalung	7.467	100.193	28.1	2071.8	5
LS08	4208	Gaw-lae	Non-glutinous	Lowland rice	Southern	Khao Chaison	Phatthalung	7.48735	100.2	28.1	2071.8	5
LS09	4216	Mae Hawm	Non-glutinous	Lowland rice	Southern	Pak Phayun	Phatthalung	7.25464	100.314	28.1	2071.8	6
LS10	4219	Chawng Ri	Non-glutinous	Lowland rice	Southern	Tamot	Phatthalung	7.29396	100.055	28.1	2071.8	46
LS11	4254	Yah-sai	Non-glutinous	Lowland rice	Southern	Pak Phayun	Phatthalung	7.29287	100.232	28.1	2071.8	24
LS12	4295	Khao Bow	Non-glutinous	Lowland rice	Southern	Mueang	Satun	6.71642	100.06	27.6	2289.9	20
LS13	4313	Khao' Gerd	Non-glutinous	Lowland rice	Southern	Mueang	Satun	6.77004	100.029	27.6	2289.9	26
LS14	4315	Khao Look Wai	Non-glutinous	Lowland rice	Southern	Mueang	Satun	6.68991	100.06	27.6	2289.9	14
LS15	4318	Niaw Look Pueng	Glutinous	Lowland rice	Southern	Mueang	Satun	6.66945	100.104	27.6	2289.9	16
LS16	4371	Hawm Jan	Non-glutinous	Lowland rice	Southern	Thung Yai	Nakhon Si Thammarat	8.34285	99.4474	27.2	2496.3	44
LS17	4524	Hua Nah	Non-glutinous	Lowland rice	Southern	Mueang	Phatthalung	7.6476	100.078	28.1	2071.8	9
LS18	4539	Bow Nam Kahng	Non-glutinous	Lowland rice	Southern	Khuan Khanun	Phatthalung	7.80644	100.055	28.1	2071.8	3
LS19	4561	Hawm Jan	Non-glutinous	Lowland rice	Southern	Ao Luek	Krabi	8.42658	98.7237	26.9	2174.4	64
LS20	4663	Pa-yah Yud Chang	Non-glutinous	Lowland rice	Southern	Thung Tako	Chumphon	10.1279	99.0239	27	1872.7	50
LS21	5206	Hua Nah	Non-glutinous	Lowland rice	Southern	Khok Pho	Pattani	6.77051	101.063	27.1	1865.1	12
LS22	5209	Look Chang	Non-glutinous	Lowland rice	Southern	Khok Pho	Pattani	6.62525	101.195	27.1	1865.1	24
LS24	7000	Sang Yod	Non-glutinous	Lowland rice	Southern	Thung Yai	Nakhon Si Thammarat	8.18091	99.3482	27.2	2496.3	60
LS25	7009	Hawm Jan	Non-glutinous	Lowland rice	Southern	Mueang	Nakhon Si Thammarat	8.4618	100.012	27.2	2496.3	4
LS26	7032	Hawm Jan	Non-glutinous	Lowland rice	Southern	Ron Phibun	Nakhon Si Thammarat	8.16329	99.8969	27.2	2496.3	18
LS27	7064	Khao' Hawm	Non-glutinous	Lowland rice	Southern	Chian Yai	Nakhon Si Thammarat	8.19058	100.167	27.2	2496.3	3
LS28	7065	Hawm Jan	Non-glutinous	Lowland rice	Southern	Ron Phibun	Nakhon Si Thammarat	8.14516	99.9456	27.2	2496.3	9
LS29	7401	Khao' Nok	Non-glutinous	Lowland rice	Southern	Khok Pho	Pattani	6.64933	101.182	27.1	1865.1	24
LS30	9673	Hawng Tawng	Non-glutinous	Lowland rice	Southern	Lang Suan	Chumphon	9.8984	99.0248	27	1872.7	37
LS31	9747	Niaw Hawm Dam	Glutinous	Lowland rice	Southern	Tha Sala	Nakhon Si Thammarat	8.7141	99.8722	27.2	2496.3	23.5
LS32	9862	Hawm	Non-glutinous	Lowland rice	Southern	Ra-ngae	Narathiwat	6.2591	101.753	27.1	2457.6	23
LS33	9943	Puang Wai	Non-glutinous	Lowland rice	Southern	Khok Pho	Pattani	6.71359	101.187	27.1	1865.1	15
LS34	9969	Look Daeng	Non-glutinous	Lowland rice	Southern	Nong Chik	Pattani	6.71749	101.222	27.1	1865.1	8
LS35	10251	Nuay Kheua	Non-glutinous	Lowland rice	Southern	Khuan Khanun	Phatthalung	7.74287	100.025	28.1	2071.8	13
LS36	10396	Bow Hawm	Non-glutinous	Lowland rice	Southern	Sikao	Trang	7.56635	99.4068	27.5	2148.5	69
LS37	10406	Pin Gaew	Non-glutinous	Lowland rice	Southern	Huai Yot	Trang	7.7497	99.4909	27.5	2148.5	34
LS38	14441	Pin Gaew Bow	Non-glutinous	Lowland rice	Southern	Lan Saka	Nakhon Si Thammarat	8.38015	99.8164	27.2	2496.3	44.5
LS39	14450	Niaw Tahn	Glutinous	Lowland rice	Southern	Chaiya	Surat Thani	9.38506	99.2185	26.8	1622	7
LS40	15541	Hawm Mali	Non-glutinous	Lowland rice	Southern	Thap Put	Phang Nga	8.44015	98.6513	27.2	3657.6	11
LS41	16737	Chang Um	Non-glutinous	Lowland rice	Southern	Mueang	Phatthalung	7.64658	100.078	28.1	2071.8	9
LS42	16898	Bow Look Wai	Non-glutinous	Lowland rice	Southern	Mueang	Phuket	7.94752	98.3641	27.65	2219.5	106
LS43	17339	Hawm Look Khuey	Non-glutinous	Lowland rice	Southern	Mueang	Phatthalung	7.45207	100.144	28.1	2071.8	15
LS44	19544	Leuang Awn	Non-glutinous	Lowland rice	Southern	Mueang	Phang Nga	8.50619	98.5009	27.2	3657.6	36.5
LS45	20318	Tawng Hawm	Non-glutinous	Lowland rice	Southern	Pak Phayun	Phatthalung	7.33553	100.341	28.1	2071.8	4
LS46	20811	Hawm Chai Yah	Non-glutinous	Lowland rice	Southern	Chaiya	Surat Thani	9.41574	99.1568	26.8	1622	21
LS47	21962	Leb Nok Pattani	Non-glutinous	Lowland rice	Southern	Khuan Khanun	Phatthalung	7.72707	100.082	28.1	2071.8	5
LS48	21963	Look Daeng Pattani	Non-glutinous	Lowland rice	Southern	Khuan Khanun	Phatthalung	7.69032	99.962	28.1	2071.8	22
LS49	21964	Chiang Phatthalung	Non-glutinous	Lowland rice	Southern	Khuan Khanun	Phatthalung	7.71445	99.9371	28.1	2071.8	36
LS50	21976	Chiang	Non-glutinous	Lowland rice	Southern	Cha-uat	Nakhon Si Thammarat	8.13749	99.9388	27.2	2496.3	9
UC01	667	PW273	Non-glutinous	Upland rice	Central
UC02	886	Khao' Pa-mah	Non-glutinous	Upland rice	Central	Bang Khen	Bangkok	13.8513	100.573	29	1500	7
UC03	1503	55NM S-4Neu	Non-glutinous	Upland rice	Central	Mueang	Suphan Buri	14.5039	100.057	28.1	975.4	8
UC04	3668	Khao' Daeng	Glutinous	Upland rice	Central	Ban Rai	Uthai Thani	15.0281	99.6426	27	1150	129
UC05	3765	Leuang	Non-glutinous	Upland rice	Central	Mueang	Nakhon Pathom	13.8228	100.123	29	1006.1	7
UC06	4410	Hawm On	Glutinous	Upland rice	Central	Bang Khen	Bangkok	13.8513	100.573	29	1500	7
UC07	5459	Hawm Bai	Non-glutinous	Upland rice	Central	Sam Ngam	Phichit	16.4487	100.2	28.1	1264.8	36
UC08	6230	Loi Hah Ruang	Non-glutinous	Upland rice	Central	Photharam	Ratchaburi	13.6865	99.8413	28.4	1164.2	11
UC09	6390	Leuang Gra-bang	Non-glutinous	Upland rice	Central	Nakhon Thai	Phitsanulok	17.0776	100.761	27.8	1317	215
UC10	6544	Puang Tawng	Non-glutinous	Upland rice	Central	Tha Wung	Lopburi	14.7956	100.503	28.2	1125.1	10
UC11	6871	Khao' Daeng	Non-glutinous	Upland rice	Central	Dan Chang	Suphan Buri	14.9607	99.3727	28.1	975.4	434
UC12	6925	Khao' Khamen	Non-glutinous	Upland rice	Central	Dan Chang	Suphan Buri	14.9278	99.635	28.1	975.4	101
UC13	8077	Auey-wawng-pu-dung	Non-glutinous	Upland rice	Central	Suan Phueng	Ratchaburi	13.5418	99.4145	28.4	1164.2	121
UC14	8082	Puey-toi	Non-glutinous	Upland rice	Central	Suan Phueng	Ratchaburi	13.6002	99.4162	28.4	1164.2	101
UC15	8088	Bueng Wo	Non-glutinous	Upland rice	Central	Suan Phueng	Ratchaburi	13.5948	99.4412	28.4	1164.2	105
UC16	8100	Ai Tai	Glutinous	Upland rice	Central	Suan Phueng	Ratchaburi	13.5555	99.4263	28.4	1164.2	128
UC17	8104	Bueng-eng-wawng-ua	Non-glutinous	Upland rice	Central	Suan Phueng	Ratchaburi	13.5009	99.2804	28.4	1164.2	198
UC18	8123	Ai-khow-pay	Glutinous	Upland rice	Central	Dan Chang	Suphan Buri	14.9702	99.6592	28.1	975.4	105.5
UC19	8135	Beu-ua Poo	Glutinous	Upland rice	Central	Dan Chang	Suphan Buri	14.9621	99.3718	28.1	975.4	434
UC20	8145	Neua Phrae	Glutinous	Upland rice	Central	Dan Chang	Suphan Buri	14.8434	99.5829	28.1	975.4	132
UC21	8155	Beu-bawng	Non-glutinous	Upland rice	Central	Dan Chang	Suphan Buri	14.901	99.6689	28.1	975.4	176
UC22	8163	Ai-khao-pay	Non-glutinous	Upland rice	Central	Dan Chang	Suphan Buri	14.896	99.7388	28.1	975.4	91
UC23	8944	Khao A-wa-gaht	Non-glutinous	Upland rice	Central	Nong Chang	Uthai Thani	15.3649	99.7641	27	1150	62
UC24	11069	Khao Dawk Mali	Non-glutinous	Upland rice	Central	Sai Yok	Kanchanaburi	14.24	99.0229	26.7	1056.4	126
UC25	11457	Pra-perng	Non-glutinous	Upland rice	Central	Sangkhla Buri	Kanchanaburi	15.1672	98.3497	26.7	1056.4	218
UC26	11467	Hawm Dong	Non-glutinous	Upland rice	Central	Si Sawat	Kanchanaburi	14.5483	98.9869	26.7	1056.4	253
UC27	11565	Leuang Hai	Non-glutinous	Upland rice	Central	Si Sawat	Kanchanaburi	14.929	99.2808	26.7	1056.4	506.5
UC29	14294	Po Bai Si	Non-glutinous	Upland rice	Central	Bang Mun Nak	Phichit	16.0195	100.443	28.1	1264.8	33
UC30	14296	Hin Gawng	Non-glutinous	Upland rice	Central	Pho Thale	Phichit	16.1342	100.25	28.1	1264.8	32
UC31	14297	Ta-pow Lom	Non-glutinous	Upland rice	Central	Pho Thale	Phichit	15.9652	100.217	28.1	1264.8	30
UC33	19681	Peuak Khao	Non-glutinous	Upland rice	Central	Nakhon Thai	Phitsanulok	17.0537	100.915	27.8	1317	238
UC36	21418	Yahw Hai	Non-glutinous	Upland rice	Central	Sangkhla Buri	Kanchanaburi	15.1107	98.3817	26.7	1056.4	171
UC37	21825	Beu-ner-ber	Non-glutinous	Upland rice	Central	Sangkhla Buri	Kanchanaburi	15.1664	98.466	26.7	1056.4	175
UC38	21829	Ai Liaw	Glutinous	Upland rice	Central	Sangkhla Buri	Kanchanaburi	15.1842	98.3264	26.7	1056.4	289
UC40	22327	Jao Khao	Non-glutinous	Upland rice	Central	Chat Trakan	Phitsanulok	17.2266	100.495	27.8	1317	222
UC44	22931	Leuang Rai	Non-glutinous	Upland rice	Central		Nakhon Sawan
UC45	22932	Poo Yai Li	Non-glutinous	Upland rice	Central		Nakhon Sawan
UC46	23073	Hawm Mali Rai	Non-glutinous	Upland rice	Central	Thong Pha Phum	Kanchanaburi	14.558	98.7602	26.7	1056.4	90
UC47	23083	Pa-per	Non-glutinous	Upland rice	Central	Sangkhla Buri	Kanchanaburi	15.2108	98.312	26.7	1056.4	387
UC48	23084	Khao' Daeng	Non-glutinous	Upland rice	Central	Sangkhla Buri	Kanchanaburi	15.2213	98.3704	26.7	1056.4	286
UN01	421	Daw Hawm 26	Glutinous	Upland rice	Northern	San Pa Tong	Chiang Mai	18.5887	98.8565	25.8	1100	301
UN02	1370	Niaw San-pah-tawng	Glutinous	Upland rice	Northern	Mueang	Chiang Rai	19.8454	99.7726	24.4	1690.5	410
UN03	1385	Hao	Glutinous	Upland rice	Northern	Mueang	Lampang	18.3507	99.5336	26.4	1045.5	254
UN04	1452	Dawk Pud	Glutinous	Upland rice	Northern	Mueang	Lampang	18.3605	99.5415	26.4	1045.5	254
UN05	1501	E-Lung	Glutinous	Upland rice	Northern	Mueang	Lampang	18.372	99.564	26.4	1045.5	246
UN06	1502	Gai Hai	Glutinous	Upland rice	Northern	Mueang	Lampang	18.3859	99.6042	26.4	1045.5	253
UN07	1831	Phrae Nai Khao	Non-glutinous	Upland rice	Northern	Mueang	Chiang Mai	18.8761	98.9947	25.8	1100	314
UN09	1840	Law	Non-glutinous	Upland rice	Northern	Mueang	Chiang Mai	18.7309	98.981	25.8	1100	302
UN10	3084	Khao Reng	Non-glutinous	Upland rice	Northern	Mueang	Mae Hong Son	19.289	97.9518	25.5	1100	240
UN11	4446	Hawm Mae-jo	Glutinous	Upland rice	Northern		Chiang Rai
UN12	4457	Ma-wai	Glutinous	Upland rice	Northern		Chiang Rai
UN13	5127	Feuang Kam	Glutinous	Upland rice	Northern	Song	Phrae	18.7749	100.296	26.4	1114.8	494
UN14	5133	Daw Lao	Glutinous	Upland rice	Northern	Mueang	Phrae	18.1353	100.108	26.4	1114.8	168
UN15	5147	Long Khi Lai	Glutinous	Upland rice	Northern	Song	Phrae	18.744	100.312	26.4	1114.8	561
UN16	5149	Hawm Tawng	Glutinous	Upland rice	Northern	Song	Phrae	18.6878	100.325	26.4	1114.8	548
UN17	5151	Feuang Ngahm	Glutinous	Upland rice	Northern	Mueang	Phrae	18.1565	100.119	26.4	1114.8	168
UN18	5152	Say	Glutinous	Upland rice	Northern	Song	Phrae	18.4297	100.164	26.4	1114.8	189
UN19	5158	Daw Hawm	Glutinous	Upland rice	Northern	Mueang	Phrae	18.1842	100.16	26.4	1114.8	158
UN20	5171	Daw Hawm	Glutinous	Upland rice	Northern	Mueang	Phrae	18.2336	100.157	26.4	1114.8	167
UN21	5249	Daw Hawm	Glutinous	Upland rice	Northern	Doi Saket	Chiang Mai	18.8605	99.1605	25.8	1100	331
UN22	6652	Sew Daeng	Glutinous	Upland rice	Northern	Wang Chin	Phrae	17.7938	99.4908	26.4	1114.8	180.5
UN23	6981	Jao Hawm	Non-glutinous	Upland rice	Northern	San Pa Tong	Chiang Mai	18.6226	98.862	25.8	1100	301
UN24	7529	Gra-Teuan Daeng	Non-glutinous	Upland rice	Northern	Mae Chaem	Chiang Mai	18.5048	98.3499	25.8	1100	520
UN25	11702	Say-Sa	Glutinous	Upland rice	Northern	Song	Phrae	18.359	100.195	26.4	1114.8	175
UN26	11736	Long Khi Kwai	Glutinous	Upland rice	Northern	Wang Chin	Phrae	17.952	99.6023	26.4	1114.8	127
UN27	17656	Leb Chahng	Glutinous	Upland rice	Northern	Mueang	Phayao	19.1201	99.8707	25.2	1037	415
UN28	17739	Leuang	Glutinous	Upland rice	Northern	Mueang	Lamphun	18.5511	99.0611	26.2	1003.8	305
UN29	19676	Niaw Lai	Non-glutinous	Upland rice	Northern	Khao Kho	Phetchabun	16.7503	101.008	27	1133.4	725
UN31	19753	Khao' Hao	Glutinous	Upland rice	Northern	Hang Dong	Chiang Mai	18.676	98.9516	25.8	1100	305
UN33	21512	Ja-te	Non-glutinous	Upland rice	Northern		Chiang Rai
UN34	21514	Aw-mae Mah	Non-glutinous	Upland rice	Northern	Mae Fa Luang	Chiang Rai	20.3497	99.5052	24.4	1690.5	857
UN35	21524	Ja-naw Beu	Glutinous	Upland rice	Northern	Mae Fa Luang	Chiang Rai	20.3413	99.5146	24.4	1690.5	857
UN36	21543	Biaw Giam Siaw	Non-glutinous	Upland rice	Northern	Pong	Phayao	19.2429	100.351	25.2	1037	337
UN37	21548	Ben Bood	Glutinous	Upland rice	Northern	Pong	Phayao	19.0815	100.266	25.2	1037	338
UN38	21549	Ben-La-Goo-Go	Glutinous	Upland rice	Northern	Pong	Phayao	19.1059	100.383	25.2	1037	414
UN39	21557	Ben Glaw	Glutinous	Upland rice	Northern	Mae Fa Luang	Chiang Rai	20.326	99.5402	24.4	1690.5	888
UN41	22359	Leuang Pra-than Yai Wai	Non-glutinous	Upland rice	Northern	Mueang	Phrae	18.2332	100.202	26.4	1114.8	163
UN42	22365	Mali 3	Non-glutinous	Upland rice	Northern	Mueang	Phrae	18.1979	100.253	26.4	1114.8	220
UN43	22399	Li Saw	Glutinous	Upland rice	Northern	Mueang	Phrae	18.1213	100.21	26.4	1114.8	234.5
UN44	22416	Gam	Glutinous	Upland rice	Northern	Mueang	Phrae	18.1035	100.178	26.4	1114.8	174
UN45	22423	Gam Ti	Glutinous	Upland rice	Northern	Mueang	Phrae	18.1235	100.185	26.4	1114.8	174
UN46	23006	Khao' Pik	Glutinous	Upland rice	Northern		Chiang Rai	18.4689	98.3738	24.4	1690.5	554
UN47	23012	Ben-Jo	Non-glutinous	Upland rice	Northern	Mae Chaem	Chiang Mai
UN48	23145	Khao' Phrae	Glutinous	Upland rice	Northern	Mae Rim	Chiang Mai	20.2786	99.5903	25.8	1100	754.5
UN49	23163	Ja-nu-nae-nae	Non-glutinous	Upland rice	Northern	Phrao	Chiang Mai	19.313	99.1985	25.8	1100	436.5
UN50	23165	Beu-wah	Non-glutinous	Upland rice	Northern	Chai Prakan	Chiang Mai	19.756	99.138	25.8	1100	497
UNE01	1664	Khao' Hao	Glutinous	Upland rice	Northeastern	Mueang	Khon Kaen	16.586	102.721	26.9	1246.8	205
UNE02	1872	Niaw Dam	Glutinous	Upland rice	Northeastern	Mueang	Khon Kaen	16.4874	102.8	26.9	1246.8	189
UNE03	1891	Hawm	Non-glutinous	Upland rice	Northeastern	Mueang	Khon Kaen	16.3107	102.831	26.9	1246.8	171
UNE05	3219	Khao' Hao	Glutinous	Upland rice	Northeastern	Chiang Khan	Loei	17.8014	101.744	25.7	1240.9	261
UNE07	4009	Leuang Sahng	Glutinous	Upland rice	Northeastern	That Phanom	Nakhon Phanom	16.9112	104.686	26.1	2346.8	148
UNE08	4475	E-Meu	Glutinous	Upland rice	Northeastern	Nong Han	Udon Thani	17.385	103.215	26.8	1418.4	174
UNE09	4476	E-Neuang	Glutinous	Upland rice	Northeastern	Nong Han	Udon Thani	17.2788	103.119	26.8	1418.4	183
UNE10	5787	Hawm Dong	Non-glutinous	Upland rice	Northeastern	Bua Yai	Nakhon Ratchasima	15.6304	102.318	27	1034.7	199
UNE11	6718	Daw Hawm	Glutinous	Upland rice	Northeastern	Mueang	Yasothon	15.8576	104.194	26.9	1342	139
UNE12	6734	Hawm Dong	Non-glutinous	Upland rice	Northeastern	Chatturat	Chaiyaphum	15.4571	101.868	27	1118	230
UNE13	7932	Rahk Haeng	Non-glutinous	Upland rice	Northeastern	Phimai	Nakhon Ratchasima	15.4499	102.679	27	1034.7	146
UNE14	7956	Jao Daeng	Non-glutinous	Upland rice	Northeastern	Bua Yai	Nakhon Ratchasima	15.4996	102.442	27	1034.7	161
UNE15	7962	Khao' Rai	Non-glutinous	Upland rice	Northeastern	Mueang	Nakhon Ratchasima	14.992	102.009	27	1034.7	188
UNE16	7975	Chao Khow	Non-glutinous	Upland rice	Northeastern	Chok Chai	Nakhon Ratchasima	14.6861	102.232	27	1034.7	198
UNE18	10164	Grim Gra-chai	Non-glutinous	Upland rice	Northeastern	Khun Han	Sisaket	14.5693	104.37	27.9	1439.6	181
UNE19	13585	Khao	Non-glutinous	Upland rice	Northeastern	Chum Phae	Khon Kaen	16.7039	101.963	26.9	1246.8	262
UNE20	13594	Daeng	Glutinous	Upland rice	Northeastern	Chum Phae	Khon Kaen	16.5046	102.273	26.9	1246.8	213
UNE21	13917	Mahk Yom	Glutinous	Upland rice	Northeastern	Tha Uthen	Nakhon Phanom	17.6102	104.503	26.1	2346.8	153
UNE22	13966	Ga-saen	Glutinous	Upland rice	Northeastern	Dong Luang	Mukdahan	16.8317	104.528	26.4	1480	188.5
UNE23	14003	Phrae	Glutinous	Upland rice	Northeastern	Don Tan	Mukdahan	16.7556	104.531	26.4	1480	181
UNE26	14037	Lai	Glutinous	Upland rice	Northeastern	Dan Sai	Loei	17.1039	101.101	25.7	1240.9	705.5
UNE27	14453	Khao' Puang	Non-glutinous	Upland rice	Northeastern	Don Phut	Saraburi	14.6353	100.614	29	1300	6
UNE28	14464	Khao Tah Phrae	Non-glutinous	Upland rice	Northeastern	Don Phut	Saraburi	14.5767	100.624	29	1300	5
UNE29	14539	Hawm Dong	Non-glutinous	Upland rice	Northeastern	Ban Phaeng	Nakhon Phanom	17.7963	104.21	26.1	2346.8	170
UNE30	15125	Chao Khow	Non-glutinous	Upland rice	Northeastern	Mueang	Loei	17.5435	101.735	25.7	1240.9	243
UNE31	15135	Hao	Glutinous	Upland rice	Northeastern	Pak Chom	Loei	17.7378	101.975	25.7	1240.9	378.5
UNE33	17632	Nahng Nuan	Glutinous	Upland rice	Northeastern	Kaset Wisai	Roi Et	15.7573	103.637	26.9	1342	134
UNE34	17640	Nahng Sa-ahd	Non-glutinous	Upland rice	Northeastern	Prasat	Surin	14.6188	103.424	27.1	1432.2	176
UNE35	17648	San-pah-tawng	Glutinous	Upland rice	Northeastern	Kaset Wisai	Roi Et	15.4888	103.543	26.9	1342	130
UNE36	17679	Gam	Glutinous	Upland rice	Northeastern	Nong Ruea	Khon Kaen	16.4867	102.412	26.9	1246.8	194
UNE37	17683	Hahng Moo	Non-glutinous	Upland rice	Northeastern	Khukhan	Sisaket	14.7234	104.192	27.9	1439.6	151
UNE38	20281	Pawng-aew	Non-glutinous	Upland rice	Northeastern	Phimai	Nakhon Ratchasima	15.3906	102.625	27	1034.7	149
UNE39	20282	Dawk Pra-doo	Non-glutinous	Upland rice	Northeastern	Phimai	Nakhon Ratchasima	15.3215	102.561	27	1034.7	151
UNE40	20283	E-leuang	Glutinous	Upland rice	Northeastern	Phimai	Nakhon Ratchasima	15.1657	102.487	27	1034.7	170
UNE42	21696	Khao' Sao	Glutinous	Upland rice	Northeastern	Wang Saphung	Loei	17.3039	101.57	25.7	1240.9	461.5
UNE46	22718	Khao Tood Ngawn	Non-glutinous	Upland rice	Northeastern	Thep Sathit	Chaiyaphum	15.5642	101.456	27	1118	302
UNE47	22724	Pah Sew	Glutinous	Upland rice	Northeastern	Mueang	Udon Thani	17.5031	102.754	26.8	1418.4	176
UNE50	22809	Long Nah	Glutinous	Upland rice	Northeastern	Mueang	Loei	17.5099	101.745	25.7	1240.9	245
US01	1911	Dawk Hawm	Non-glutinous	Upland rice	Southern	Mueang	Nakhon Si Thammarat	8.48867	99.9698	27.2	2496.3	5
US02	1931	Sai	Non-glutinous	Upland rice	Southern	Khuan Khanun	Phatthalung	7.74966	99.9691	28.1	2071.8	22
US03	1947	Dawk Pa-yawm	Non-glutinous	Upland rice	Southern	Khuan Khanun	Phatthalung	7.76082	100.058	28.1	2071.8	3
US05	11131	Leb Nok	Non-glutinous	Upland rice	Southern	Mueang	Phang Nga	8.46293	98.4894	27.2	3657.6	69
US06	12637	Jaek	Non-glutinous	Upland rice	Southern	Chana	Songkhla	6.8887	100.689	27.9	2066.7	20
US07	12763	Yah Maw	Non-glutinous	Upland rice	Southern	Thepha	Songkhla	6.7113	100.952	27.9	2066.7	19
US08	12764	Yah Yaw	Non-glutinous	Upland rice	Southern	Sathing Phra	Songkhla	7.58876	100.386	27.9	2066.7	5
US09	12810	Jeu Lah Ngaw	Non-glutinous	Upland rice	Southern	Nong Chik	Pattani	6.71984	101.241	27.1	1865.1	8
US10	12811	Leuang	Non-glutinous	Upland rice	Southern	Thepha	Songkhla	6.88321	100.815	27.9	2066.7	10
US11	12813	Soo Pawng Ming	Non-glutinous	Upland rice	Southern	Nong Chik	Pattani	6.74477	101.218	27.1	1865.1	8
US12	12815	Nahng Mui Dawk Khaek	Non-glutinous	Upland rice	Southern	Sathing Phra	Songkhla	7.54001	100.406	27.9	2066.7	1
US13	12817	Hawm	Non-glutinous	Upland rice	Southern	Mueang	Yala	6.57825	101.174	27.9	2222.1	36
US14	12818	Feun Din	Non-glutinous	Upland rice	Southern	Khok Pho	Pattani	6.75233	101.134	27.1	1865.1	5
US15	12823	Pah Chae	Non-glutinous	Upland rice	Southern	Mueang	Yala	6.56691	101.194	27.9	2222.1	36
US18	12852	Ah-naw Mah Daw	Non-glutinous	Upland rice	Southern	Nong Chik	Pattani	6.74447	101.207	27.1	1865.1	15
US19	12854	Seu Rah	Non-glutinous	Upland rice	Southern	Mueang	Yala	6.55241	101.21	27.9	2222.1	30
US20	12856	Yah-bo-ji-naw	Non-glutinous	Upland rice	Southern	Mueang	Yala	6.64245	101.284	27.9	2222.1	17
US21	12866	Maw-mi-ngeng	Non-glutinous	Upland rice	Southern	Nong Chik	Pattani	6.78202	101.218	27.1	1865.1	8
US22	12872	Leuang	Non-glutinous	Upland rice	Southern	Khok Pho	Pattani	6.77922	101.104	27.1	1865.1	6
US23	14330	Bow Leuang	Non-glutinous	Upland rice	Southern	Mueang	Phatthalung	7.46122	100.178	28.1	2071.8	5
US24	14363	Buk Yah	Non-glutinous	Upland rice	Southern	Mueang	Phatthalung	7.44305	100.197	28.1	2071.8	9
US25	15524	Khiaw	Non-glutinous	Upland rice	Southern	La-un	Ranong	10.0868	98.7863	27.1	4068.4	38
US26	15536	Jae-San	Non-glutinous	Upland rice	Southern	Takua Pa	Phang Nga	8.819	98.2935	27.2	3657.6	36
US27	15727	Dawk Prao	Non-glutinous	Upland rice	Southern	Na Mom	Songkhla	6.97503	100.565	27.9	2066.7	44.5
US28	15775	Yah Lam Pae	Non-glutinous	Upland rice	Southern	Yi-ngo	Narathiwat	6.57915	101.65	27.1	2457.6	15
US29	15789	Yi-tae-sah-ming	Non-glutinous	Upland rice	Southern	Bacho	Narathiwat	6.50837	101.654	27.1	2457.6	25
US30	16461	Dawk Pud	Non-glutinous	Upland rice	Southern	Mueang	Pattani	6.83462	101.256	27.1	1865.1	5
US31	16691	Dawk Mud	Non-glutinous	Upland rice	Southern	Mueang	Satun	6.68399	100.058	27.6	2289.9	14
US32	17655	Bow Ti	Non-glutinous	Upland rice	Southern	Mueang	Satun	6.73196	100.056	27.6	2289.9	20
US33	17764	An-li-bah-bah	Non-glutinous	Upland rice	Southern	Mueang	Satun	6.71007	100.057	27.6	2289.9	20
US34	19248	Pae-nae	Non-glutinous	Upland rice	Southern	Mueang	Phatthalung	7.50445	100.043	28.1	2071.8	19
US35	19271	Nahng Rang	Non-glutinous	Upland rice	Southern	Mueang	Phatthalung	7.62272	100.062	28.1	2071.8	13
US36	19543	Niaw Sai Mai	Glutinous	Upland rice	Southern	Thai Mueang	Phang Nga	8.33588	98.2828	27.2	3657.6	10
US37	20348	Khao Mah-lay	Non-glutinous	Upland rice	Southern	Mueang	Pattani	6.83581	101.283	27.1	1865.1	5
US38	23795	Khao Rai	Non-glutinous	Upland rice	Southern	Wiang Sa	Surat Thani	8.59924	99.3275	26.8	1622	25
US39	23798	Khem Ngern Rai	Non-glutinous	Upland rice	Southern	Khian Sa	Surat Thani	8.69623	99.1251	26.8	1622	48
US40	23810	Niaw Peuang Dam	Glutinous	Upland rice	Southern	Na Thawi	Songkhla	6.77393	100.68	27.9	2066.7	23
US41	23813	Niaw Dam	Glutinous	Upland rice	Southern	Na Thawi	Songkhla	6.77273	100.697	27.9	2066.7	23
US42	23819	Niaw Daeng	Glutinous	Upland rice	Southern	Na Thawi	Songkhla	6.77351	100.697	27.9	2066.7	23
US43	23837	Niaw Dam Peuang Khao	Glutinous	Upland rice	Southern	Mueang	Phatthalung	7.63271	100.111	28.1	2071.8	5
US44	23840	Dam Nok Lah	Glutinous	Upland rice	Southern	Mueang	Trang	7.57054	99.5398	27.5	2148.5	23
US47	23846	Dawk Pa-yawm Rai	Non-glutinous	Upland rice	Southern	Mueang	Trang	7.61796	99.4912	27.5	2148.5	37
US48	23856	Dawk Pa-yawm	Non-glutinous	Upland rice	Southern	Wang Wiset	Trang	7.68312	99.4866	27.5	2148.5	24.5
US49	23859	Niaw Rai	Glutinous	Upland rice	Southern	Wang Wiset	Trang	7.67555	99.4484	27.5	2148.5	31
US50	23860	Leb Nok Rai	Non-glutinous	Upland rice	Southern	Wang Wiset	Trang	7.63608	99.475	27.5	2148.5	31
