# Supplementary material
Source: MDPI journal article supplement (https://www.mdpi.com/2073-4395/11/5/995)
Supplement: s1 [file s1 › Table S2 - 72 acc of 3K.xlsx]

## Sheet: Sheet1
Table S2. List of 72 representative of 3,000 rice genomes assigned to five genetic groups.
Genetic_Stock_Acc	GS_IRIS_varname	Country_Origin	REGION	Group	DNA_ID
127948	ARC 13502::IRGC 41126-2	India	Ind-Npl	aromatic	IRIS_313-10177
127959	ARC 14663::IRGC 41671-2	India	Ind-Npl	aromatic	IRIS_313-10337
127971	ARC 18578::IRGC 42459-2	India	Ind-Npl	aromatic	IRIS_313-10852
126958	IET 14720::IRTP 23179-G1		na	aromatic	IRIS_313-10870
117494	JC 1	India	Ind-Npl	aromatic	IRIS_313-11052
127169	ARC 7336::IRGC 20606-1	India	Ind-Npl	aus	IRIS_313-11058
127182	AUS 278::IRGC 29068-1	Bangladesh	Bgd-Bhu	aus	IRIS_313-11094
127188	AUS 329::IRGC 29116-1	Bangladesh	Bgd-Bhu	aus	IRIS_313-11251
127152	ARC 13544::IRGC 42743-1	India	Ind-Npl	aus	IRIS_313-11258
127283	CHUNDI::IRGC 67486-1	India	Ind-Npl	aus	IRIS_313-11270
128387	MHARAKA::IRGC 70612-1	Kenya	EAF	aus	IRIS_313-11289
126955	COLOMBIA XXI::G1	Colombia	SAM	aus	IRIS_313-11298
127464	JIN HUA 258::IRGC 63670-1	China	EAS	Indica	IRIS_313-11643
127771	RONG DAO 4::IRGC 63820-1	China	EAS	Indica	IRIS_313-11645
127345	DU GEN CHUAN::IRGC 70083-1	China	EAS	Indica	IRIS_313-11646
127460	JIE CAO ZHAN::IRGC 70305-1	China	EAS	Indica	IRIS_313-11651
127895	XI HONG GU::IRGC 70416-1	China	EAS	Indica	IRIS_313-11652
132340	IR 4500-5-1-1::IRGC 40552-2	Philippines	SEA2-irri	Indica	IRIS_313-11661
127662	NCS 603 B::IRGC 62377-1	India	Ind-Npl	Indica	IRIS_313-11665
127365	E ZI 100::IRGC 70192-1	China	EAS	Indica	IRIS_313-11668
126957	FEDEARROZ 50::G1	Colombia	SAM	Indica	IRIS_313-11673
126964	IR 77298-14-1-2-10::G1	Philippines	SEA2-irri	Indica	IRIS_313-11681
126966	IRRI 146::G1	Philippines	SEA2	Indica	IRIS_313-11683
122285	WAS 173-B-B-6-2-2::C1	Senegal	WAF	Indica	IRIS_313-11685
127664	NCS 766::IRGC 62478-1	India	Ind-Npl	Indica	IRIS_313-11686
127665	NCS 771 A::IRGC 62483-1	India	Ind-Npl	Indica	IRIS_313-11687
127320	DISSIGBE::IRGC 66916-1	Guinea	WAF	Indica	IRIS_313-11689
127867	TSIPALA MENAHAR::IRGC 69979-1	Madagascar	Indoce	Indica	IRIS_313-11700
132426	KHAO' PAWM::IRGC 64416-2	Thailand	SEA	Indica	IRIS_313-11710
127677	NIAW KHIAW NGOO::IRGC 64563-1	Thailand	SEA	Indica	IRIS_313-11711
127735	PLAWNG SAENG::IRGC 64595-1	Thailand	SEA	Indica	IRIS_313-11717
132366	QUAHNG LUANG::IRGC 64609-2	Thailand	SEA	Indica	IRIS_313-11723
132297	SA GAE::IRGC 64613-1	Thailand	SEA	Indica	IRIS_313-11725
127306	DAW NOK KAEN::IRGC 65548-1	Thailand	SEA	Indica	IRIS_313-11728
	LEUANG MAI::IRGC 66019-2	Thailand	SEA	Indica	IRIS_313-11736
132295	RAI MAHK MEUANG::IRGC 66154-1	Thailand	SEA	Indica	IRIS_313-11737
127581	LUO SI ZHAN::IRGC 67211-1	China	EAS	Indica	IRIS_313-11740
127175	ASFALA::IRGC 70650-1	Kenya	EAF	Indica	IRIS_313-11744
132362	PADINTHUMA::IRGC 70762-2	Myanmar	SEA	Indica	IRIS_313-11748
131932	BATU::IRGC 71508-1	Malaysia	SEA2	Indica	IRIS_313-11755
128537	MELABOH::IRGC 66597-1	Indonesia	SEA2	Indica	IRIS_313-11759
131937	GUMPANGAR::IRGC 71524-1	Malaysia	SEA2	Indica	IRIS_313-11790
125719	DA GANG ZHAN::IRGC 67103-1	China	EAS	Indica	IRIS_313-11794
125953	B 6149 F-MR-7::IRGC 117314-1	Indonesia	SEA2	Indica	IRIS_313-11796
127450	JATI MANI::IRGC 66565-1	Indonesia	SEA2	Indica	IRIS_313-11798
127872	UGAGA::IRGC 67604-1	Ghana	WAF	Indica	IRIS_313-11802
127114	AI JIAO AO FAN ZI::IRGC 67871-1	China	EAS	Indica	IRIS_313-11805
127378	GAO JIAO YING GAN ZHAN::IRGC 68053-1	China	EAS	Indica	IRIS_313-11807
127757	R 582::IRGC 70504-1	Colombia	NWD	Indica	IRIS_313-11809
128085	KHAOSAING::IRGC 70746-2	Myanmar	SEA	Indica	IRIS_313-11812
126962	IR 4630-22-2-5-1-3::G1	Philippines	SEA2-irri	Indica	IRIS_313-11817
126961	IR 45427-2B-2-2B-1-1::G1	Philippines	SEA2-irri	Indica	IRIS_313-11819
126960	IR 07F287::G1	Philippines	SEA2-irri	Indica	IRIS_313-11900
126963	IR 73571-3B-11-3-K2::G1	Philippines	SEA2-irri	Indica	IRIS_313-12349
128291	FEI ZHAO 12::IRGC 62683-1	China	EAS	temperate japonica	IRIS_313-15896
128303	GONG SHE 9::IRGC 62693-1	China	EAS	temperate japonica	IRIS_313-15898
131960	91-382::IRGC 63464-1	Bhutan	Bgd-Bhu	temperate japonica	IRIS_313-15899
128275	DECHANGBYEO::IRGC 64858-1	Korea, Republic of	EAS-2	temperate japonica	IRIS_313-15900
128514	ZUIHOU::IRGC 66982-1	Japan	EAS-2	temperate japonica	IRIS_313-15901
126967	JINBUBYEO::G1	Korea, Republic of	EAS-2	temperate japonica	IRIS_313-15902
128248	BURI BURING::IRGC 64174-1	Philippines	SEA2	tropical japonica	IRIS_313-15904
127595	MALAGKIT (PINELIPE)::IRGC 67444-1	Philippines	SEA2	tropical japonica	IRIS_313-15905
131961	A 2-257::IRGC 68342-1	Liberia	WAF	tropical japonica	IRIS_313-15906
131995	K 2 C 45::IRGC 68552-1	Cote d'Ivoire	WAF	tropical japonica	IRIS_313-15907
127883	VARIRANGAHY::IRGC 69897-1	Madagascar	Indoce	tropical japonica	IRIS_313-15908
126969	WAB 56-125::IRTP 19771-G1	Cote d'Ivoire	WAF	tropical japonica	IRIS_313-15909
126959	INIA TACUARI::G1	Uruguay	SAM	tropical japonica	IRIS_313-7808
121959	A 201::GERVEX 1638-C1	United States of America	NAM	tropical japonica	IRIS_313-8173
131966	ARC 11768::IRGC 21630-1	India	Ind-Npl	tropical japonica	IRIS_313-8312
132274	MAK BOUAP::IRGC 30106-3	Lao People's Democratic Republic	SEA	tropical japonica	IRIS_313-8326
128435	PLE LIA::IRGC 73562-1	Thailand	SEA	tropical japonica	IRIS_313-8493
127592	MAK KHEUA DENG::IRGC 107709-1	Lao People's Democratic Republic	SEA	tropical japonica	IRIS_313-9409
