# Supplementary material
Source: MDPI journal article supplement (https://www.mdpi.com/2073-4395/11/5/995)
Supplement: s1 [file s1 › Table S3 - List of 102 SNP markers.xlsx]

## Sheet: Sheet2
Table S3. List of 102 SNP markers used for genotyping.
Marker	Chr	Pos	REF (Nipponbare)	ALT
R01002684973	1	2684973	C	A
R01008961781	1	8961781	C	A
R01010626068	1	10626068	C	G
R01023762056	1	23762056	G	A
R01033064986	1	33064986	T	C
R01033454937	1	33454937	A	T
R01034609753	1	34609753	C	G
R01036673058	1	36673058	C	T
R02008303326	2	8303326	G	A
R02008313120	2	8313120	G	T
R02008315835	2	8315835	T	A
R02010864977	2	10864977	G	T
R02010931823	2	10931823	G	A
R02019361361	2	19361361	A	C
R02019361361	2	19361361	A	C
R02019361451	2	19361451	G	T
R03000182894	3	182894	C	T
R03010043426	3	10043426	T	C
R03016733359	3	16733359	A	C
R03017286744	3	17286744	G	T
R03017571575	3	17571575	G	A
R03031335170	3	31335170	C	T
R03031437173	3	31437173	C	A
R03033687380	3	33687380	CGCCGTCGTGGCTGCGGCTGTGCTGTGC:CGCCGTCGTGGCTGCGGCTGTGCTGTGC	-:-
R04001019335	4	1019335	A	G
R04005867320	4	5867320	T	G
R04006451939	4	6451939	C	T
R04006968050	4	6968050	A	G
R04011087541	4	11087541	G	T
R04011803874	4	11803874	T	A
R04016214690	4	16214690	TTTATGCCTCTGGTGTGACCA:TTTATGCCTCTGGTGTGACCA	-:-
R04016214692	4	16214692	CA	TG
R04016218749	4	16218749	T	G
R04022184296	4	22184296	A	G
R04023172729	4	23172729	T	G
R04023175725	4	23175725	T	C
R05000437499	5	437499	T	A
R05003673333	5	3673333	T	C
R05017247355	5	17247355	G	T
R05019155333	5	19155333	A	G
R05019155705	5	19155705	G	T
R05023218617	5	23218617	A	C
R05026487913	5	26487913	A	G
R05028876504	5	28876504	A	T
R05028876779	5	28876779	A	C
R06001693194	6	1693194	G	A
R06001693411	6	1693411	A	C
R06001765760	6	1765760	G	T
R06001768006	6	1768006	A	C
R06001768724	6	1768724	T	C
R06001768997	6	1768997	C	T
R06006752754	6	6752754	G	A
R06006752886	6	6752886	G	T
R06006752887	6	6752887	G	T
R07005820521	7	5820521	C	G
R07005873563	7	5873563	G	A
R07006780119	7	6780119	G	A
R07020013105	7	20013105	G	T
R07020826100	7	20826100	G	T
R07024350575	7	24350575	C	T
R07025982551	7	25982551	A	G
R07027746661	7	27746661	C	G
R08002257332	8	2257332	G	A
R08002269285	8	2269285	G	C
R08002890407	8	2890407	G	A
R08003007900	8	3007900	C	G
R08020382861	8	20382861	ATTATGGC	-:-
R08027057202	8	27057202	G	A
R08027176617	8	27176617	C	A
R08027943348	8	27943348	G	A
R09004198183	9	4198183	C	A
R09006405230	9	6405230	C	T
R09007245205	9	7245205	A	T
R09007245448	9	7245448	C	T
R09007245650	9	7245650	A	G
R09007245739	9	7245739	C	G
R09007246222	9	7246222	T	G
R09007246804	9	7246804	T	G
R10006731388	10	6731388	C	T
R10014555161	10	14555161	G	A
R10015675357	10	15675357	A	G
R10015680316	10	15680316	C	A
R10017572305	10	17572305	G	A
R10020662195	10	20662195	A	G
R10021323194	10	21323194	G	A
R10021955049	10	21955049	A	G
R11013840467	11	13840467	A	G
R11014118135	11	14118135	A	G
R11014118965	11	14118965	G	A
R11014169508	11	14169508	C	A
R11021102804	11	21102804	C	A
R11021481048	11	21481048	ATT	-:-
R11028209211	11	28209211	A	T
R11028227346	11	28227346	C	G
R12009613648	12	9613648	A	C
R12018759236	12	18759236	T	G
R12018763706	12	18763706	T	C
R12018856177	12	18856177	G	A
R12022373643	12	22373643	A	G
R12022392129	12	22392129	C	G
R12023173265	12	23173265	T	A
R12025357473	12	25357473	AAGAA:AAGAA	-:-
