# Supplementary material
Source: MDPI journal article supplement (https://www.mdpi.com/2073-4395/11/5/995)
Supplement: s1 [file s1 › Table S4 - Rice informations_groups.xlsx]

## Sheet: Sheet1
Table S4. List of 365 rice accessions used in the study.
Code	Name	GS.Number	Ecosystem	Region	District	Province	Latitude	Longitude	Type	Maximum Likelihood	DAPC	STRUCTURE	K1	K2	K3
LC01	Khao Sa-ong	788	Lowland rice	Central	Khok Samrong	Lopburi	15.1331	100.643	Non-glutinous	Indica I	1	Group I	0.989	0.006	0.005
LC02	Khao Puang	798	Lowland rice	Central	Mueang	Phra Nakhon Si Ayutthaya	14.3252	100.518	Non-glutinous	Indica I	1	Group I	0.991	0.005	0.004
LC03	Khao' Hawm	1626	Lowland rice	Central	Mueang	Ang Thong	14.6237	100.408	Non-glutinous	Indica II	2	Group II	0.004	0.994	0.001
LC04	Hawm Tang	1628	Lowland rice	Central	Mueang	Ang Thong	14.6175	100.479	Non-glutinous	Indica II	2	Group II	0.238	0.759	0.003
LC05	Hawm Tang	1629	Lowland rice	Central	Mueang	Ang Thong	14.6025	100.486	Non-glutinous	Indica II	2	Group II	0.004	0.995	0.001
LC06	Leuang Hawm	1751	Lowland rice	Central	Mueang	Suphan Buri	14.5763	99.9207	Non-glutinous	Indica I	1	Group I	0.991	0.002	0.006
LC07	Hawm India	2018	Lowland rice	Central	Mueang	Chai Nat	15.1096	100.078	Non-glutinous	Indica I	2	Group I	0.666	0.333	0.002
LC08	Hawm Mali	2747	Lowland rice	Central	Taphan Hin	Phichit	16.204	100.371	Non-glutinous	Indica I	2	Group I	0.538	0.46	0.002
LC09	Khao' Hawm	2751	Lowland rice	Central	Mueang	Ang Thong	14.5463	100.457	Non-glutinous	Indica II	2	Group II	0.004	0.995	0.001
LC10	Khao Cha-wat	3683	Lowland rice	Central	Hankha	Chai Nat	15.12	99.8312	Non-glutinous	Indica I	1	Group I	0.972	0.027	0.002
LC11	Tah Pi	3686	Lowland rice	Central	Hankha	Chai Nat	15.0562	99.9132	Non-glutinous	Indica I	1	Group I	0.914	0.085	0.001
LC12	Khao Sa-wat	3688	Lowland rice	Central	Hankha	Chai Nat	15.0119	99.9621	Non-glutinous	Indica I	1	Group I	0.615	0.383	0.001
LC13	Khao Tah Haeng	6155	Lowland rice	Central	Sam Khok	Pathum Thani	14.1014	100.442	Non-glutinous	Indica I	1	Group I	0.991	0.005	0.004
LC14	Khao Gaew	6162	Lowland rice	Central	Sam Khok	Pathum Thani	14.0833	100.545	Non-glutinous	Indica I	1	Group I	0.991	0.005	0.004
LC15	Hawm Mali	6426	Lowland rice	Central	Khlong Luang	Pathum Thani	14.1389	100.746	Non-glutinous	Indica I	2	Group I	0.557	0.442	0.002
LC16	Leuang Hawm	6444	Lowland rice	Central	Nong Suea	Pathum Thani	14.0594	100.761	Non-glutinous	Indica I	1	Group I	0.554	0.445	0.002
LC17	Leuang Tia	6455	Lowland rice	Central	Nong Suea	Pathum Thani	14.1419	100.794	Non-glutinous	Indica I	1	Group I	0.995	0.002	0.002
LC18	Leuang Hawm	6465	Lowland rice	Central	Mueang	Uthai Thani	15.4268	99.9922	Non-glutinous	Intermediate	2	Group II	0.396	0.579	0.025
LC19	Bow Hawm	6480	Lowland rice	Central	Wat Sing	Chai Nat	15.1539	99.88	Non-glutinous	Indica I	1	Group I	0.922	0.075	0.002
LC20	Nahng Yuan	6515	Lowland rice	Central	Hankha	Chai Nat	14.9378	100.009	Non-glutinous	Indica I	1	Group I	0.711	0.287	0.002
LC21	Bang Ga-pi	6517	Lowland rice	Central	Hankha	Chai Nat	15.0035	100.053	Glutinous	Indica II	2	Group II	0.012	0.986	0.002
LC22	Gaen Taeng	6543	Lowland rice	Central	Ban Mi	Lopburi	15.0785	100.575	Glutinous	Indica II	2	Group II	0.006	0.991	0.003
LC23	Nahng Pa-yah	6887	Lowland rice	Central	Mueang	Suphan Buri	14.5323	99.9795	Non-glutinous	Indica I	1	Group I	0.997	0.002	0.001
LC24	Khao Luang	9169	Lowland rice	Central	Sankhaburi	Chai Nat	14.9629	100.151	Non-glutinous	Indica I	1	Group I	0.908	0.069	0.023
LC25	Leuang Ra haeng	9554	Lowland rice	Central	Mueang	Nakhon Pathom	13.9311	99.9428	Non-glutinous	Indica I	1	Group I	0.997	0.002	0.001
LC26	Leuang Tawng Kam	9559	Lowland rice	Central	Mueang	Nakhon Pathom	13.8835	100.007	Non-glutinous	Indica I	1	Group I	0.624	0.374	0.002
LC27	Khao E-jiak	9565	Lowland rice	Central	Mueang	Nakhon Pathom	13.8909	100.079	Non-glutinous	Indica I	1	Group I	0.836	0.148	0.016
LC28	Leuang Pra-tew	9574	Lowland rice	Central	Kamphaeng Saen	Nakhon Pathom	14.1237	100.033	Non-glutinous	Indica I	1	Group I	0.985	0.013	0.002
LC29	Leuang	9578	Lowland rice	Central	Kamphaeng Saen	Nakhon Pathom	13.9252	100.01	Non-glutinous	Indica I	1	Group I	0.992	0.003	0.005
LC30	Khao Gaw Diaw	9583	Lowland rice	Central	Song Phi Nong	Suphan Buri	14.1355	99.8227	Non-glutinous	Indica I	1	Group I	0.991	0.007	0.002
LC31	Khao Set-ti	9598	Lowland rice	Central	Mueang	Nakhon Pathom	13.8528	100.124	Non-glutinous	Indica I	1	Group I	0.994	0.003	0.003
LC32	Khao Luang	10775	Lowland rice	Central	Mueang	Samut Prakan	13.5311	100.692	Non-glutinous	Indica I	1	Group I	0.997	0.002	0.001
LC33	Luang Pra-than Tia	10858	Lowland rice	Central	Wang Sai Phun	Phichit	16.37	100.557	Non-glutinous	Indica I	1	Group I	0.986	0.012	0.002
LC34	Leuang Awn	11427	Lowland rice	Central	Ban Rai	Uthai Thani	15.2212	99.4352	Non-glutinous	Indica II	2	Group II	0.002	0.997	0.001
LC35	Khao Sa-mer	14474	Lowland rice	Central	Don Tum	Nakhon Pathom	13.9386	100.141	Non-glutinous	Indica I	1	Group I	0.991	0.005	0.004
LC36	Leuang Nuan	14484	Lowland rice	Central	Nakhon Chai Si	Nakhon Pathom	13.8587	100.245	Non-glutinous	Indica I	1	Group I	0.992	0.003	0.005
LC37	Di Si	15954	Lowland rice	Central	Mueang	Chai Nat	15.1816	100.115	Non-glutinous	Indica I	1	Group I	0.995	0.003	0.002
LC38	Leuang Roi Et	15957	Lowland rice	Central	Mueang	Chai Nat	15.1871	100.169	Non-glutinous	Indica I	1	Group I	0.995	0.003	0.002
LC39	Leuang Tawng	15971	Lowland rice	Central	Mueang	Chai Nat	15.226	100.126	Non-glutinous	Indica I	1	Group I	0.69	0.308	0.002
LC40	Hah Ruang Bow	15974	Lowland rice	Central	Mueang	Chai Nat	15.2629	100.108	Non-glutinous	Indica I	1	Group I	0.539	0.45	0.011
LC41	Nahng Dam	18203	Lowland rice	Central	Pho Thong	Ang Thong	14.6718	100.342	Non-glutinous	Indica I	1	Group I	0.725	0.273	0.002
LC42	Puang Pa-yawm	19860	Lowland rice	Central	Wat Sing	Chai Nat	15.2486	100.021	Non-glutinous	Indica II	2	Group II	0.428	0.57	0.001
LC43	Khao Pra-guad	20960	Lowland rice	Central	Nakhon Luang	Phra Nakhon Si Ayutthaya	14.475	100.652	Non-glutinous	Indica I	1	Group I	0.996	0.003	0.001
LC44	Khao Tah Haeng Rang Si	20987	Lowland rice	Central	Ban Mi	Lopburi	14.965	100.511	Non-glutinous	Indica I	1	Group I	0.995	0.004	0.002
LC45	Leuang Pin Gaew	21347	Lowland rice	Central	Song Phi Nong	Suphan Buri	14.1922	100.026	Non-glutinous	Indica II	2	Group II	0.341	0.652	0.007
LC46	Khao Sa-ahd	21920	Lowland rice	Central	Tha Luang	Lopburi	15.0552	101.197	Non-glutinous	Indica II	2	Group II	0.002	0.996	0.001
LC47	Hawm Gu-lahb	22041	Lowland rice	Central	Mueang	Chai Nat	15.2355	100.177	Non-glutinous	Indica I	1	Group I	0.985	0.013	0.002
LC48	Hawm Ta-krai	22042	Lowland rice	Central	Mueang	Chai Nat	15.2156	100.274	Non-glutinous	Indica I	1	Group II	0.472	0.526	0.001
LC49	Pin Gaew Bow	22043	Lowland rice	Central	Khok Samrong	Lopburi	14.9779	100.808	Non-glutinous	Indica I	1	Group I	0.883	0.115	0.001
LN01	Pah Leuad Kwai	137	Lowland rice	Northern	San Pa Tong	Chiang Mai	18.6581	98.832	Glutinous	Indica II	2	Group II	0.042	0.957	0.001
LN02	Daw E-hen	143	Lowland rice	Northern	San Pa Tong	Chiang Mai	18.6616	98.8882	Glutinous	Indica II	2	Group II	0.002	0.996	0.001
LN03	Nahng Pim Pah	155	Lowland rice	Northern	San Pa Tong	Chiang Mai	18.5707	98.8944	Glutinous	Indica II	2	Group II	0.004	0.935	0.062
LN04	Gaew Piang	158	Lowland rice	Northern	San Pa Tong	Chiang Mai	18.6247	98.9141	Glutinous	Indica II	2	Group II	0.405	0.59	0.004
LN05	Pah Piang	168	Lowland rice	Northern	San Pa Tong	Chiang Mai	18.6611	98.8857	Glutinous	Indica II	2	Group II	0.034	0.964	0.002
LN06	Leuang Pin Tawng	215	Lowland rice	Northern	San Pa Tong	Chiang Mai	18.5234	98.8767	Non-glutinous	Indica II	2	Group II	0.004	0.995	0.001
LN07	Hawm Tu-rian	231	Lowland rice	Northern	San Pa Tong	Chiang Mai	18.5635	98.8924	Non-glutinous	Intermediate	2	Group II	0.434	0.563	0.003
LN08	Lampang	238	Lowland rice	Northern	San Pa Tong	Chiang Mai	18.5933	98.8974	Non-glutinous	Indica I	1	Group I	0.935	0.059	0.006
LN09	Leuang Awn	239	Lowland rice	Northern	San Pa Tong	Chiang Mai	18.6214	98.9034	Non-glutinous	Indica I	1	Group I	0.987	0.01	0.003
LN10	Khao Leb	243	Lowland rice	Northern	San Pa Tong	Chiang Mai	18.6337	98.907	Non-glutinous	Indica II	2	Group II	0.01	0.989	0.001
LN11	Leuang Awn	249	Lowland rice	Northern	San Pa Tong	Chiang Mai	18.6422	98.914	Non-glutinous	Indica I	1	Group I	0.988	0.009	0.003
LN12	Mae Ped	257	Lowland rice	Northern	San Pa Tong	Chiang Mai	18.6523	98.8951	Non-glutinous	Indica II	2	Group II	0.233	0.766	0.001
LN13	Sa-mer Jai	259	Lowland rice	Northern	San Pa Tong	Chiang Mai	18.6616	98.888	Non-glutinous	Indica I	1	Group I	0.557	0.44	0.003
LN14	Khao Jan	334	Lowland rice	Northern	San Pa Tong	Chiang Mai	18.6533	98.878	Non-glutinous	Indica II	2	Group II	0.002	0.996	0.001
LN15	Niaw Leuad Raed	337	Lowland rice	Northern	San Pa Tong	Chiang Mai	18.6444	98.875	Glutinous	Indica II	2	Group II	0.005	0.994	0.001
LN16	Gaew	1409	Lowland rice	Northern	Mueang	Lampang	18.5201	99.468	Glutinous	Indica II	2	Group II	0.003	0.995	0.002
LN17	Wang Hin	1411	Lowland rice	Northern	Mueang	Lampang	18.4816	99.465	Glutinous	Indica II	2	Group II	0.004	0.995	0.001
LN18	Gahb Sahng	1412	Lowland rice	Northern	Mueang	Lampang	18.4366	99.4301	Glutinous	Indica II	2	Group II	0.007	0.992	0.001
LN19	Jao Hawm	1413	Lowland rice	Northern	Mueang	Lampang	18.4043	99.5161	Non-glutinous	Indica I	1	Group I	0.576	0.423	0.001
LN20	Daw Dawk Prao	1418	Lowland rice	Northern	Mueang	Lampang	18.3745	99.5421	Glutinous	Indica II	2	Group II	0.004	0.995	0.001
LN21	Leb Chang	1424	Lowland rice	Northern	Mueang	Lampang	18.4283	99.6247	Glutinous	Indica II	2	Group II	0.003	0.995	0.002
LN22	Nahng Nuan	1425	Lowland rice	Northern	Mueang	Lampang	18.4921	99.6149	Glutinous	Indica I	1	Group I	0.702	0.29	0.008
LN23	Gaew Noi	1433	Lowland rice	Northern	Mueang	Lampang	18.4532	99.6749	Non-glutinous	Indica I	1	Group I	0.989	0.009	0.002
LN24	Mon	1438	Lowland rice	Northern	Mueang	Lampang	18.2616	99.4899	Glutinous	Indica II	2	Group II	0.003	0.996	0.001
LN25	Gow Nam Pueng	1439	Lowland rice	Northern	Mueang	Lampang	18.2856	99.4551	Non-glutinous	Indica II	2	Group II	0.351	0.648	0.001
LN26	Nam Pak Good	1442	Lowland rice	Northern	Mueang	Lampang	18.3308	99.4902	Glutinous	Indica I	1	Group I	0.992	0.006	0.001
LN27	Taeng Awn	1443	Lowland rice	Northern	Mueang	Lampang	18.4077	99.5166	Glutinous	Indica II	2	Group II	0.005	0.993	0.002
LN28	Niaw Sahm Pew	1446	Lowland rice	Northern	Mueang	Lampang	18.4263	99.5499	Glutinous	Indica II	2	Group II	0.002	0.996	0.002
LN29	Man Tun	1448	Lowland rice	Northern	Mueang	Lampang	18.348	99.4421	Glutinous	Indica II	2	Group II	0.005	0.993	0.002
LN30	Feuang Leuang	1449	Lowland rice	Northern	Mueang	Lampang	18.3949	99.488	Glutinous	Indica II	2	Group II	0.003	0.995	0.002
LN31	Gah Long	1451	Lowland rice	Northern	Mueang	Lampang	18.3133	99.4972	Non-glutinous	Indica II	2	Group II	0.044	0.955	0.001
LN32	Lang Gai Mon	1454	Lowland rice	Northern	Mueang	Lampang	18.4246	99.6001	Glutinous	Indica II	2	Group II	0.005	0.994	0.001
LN33	Lang Gow Lae	1455	Lowland rice	Northern	Mueang	Lampang	18.4435	99.6744	Glutinous	Indica II	2	Group II	0.317	0.681	0.001
LN34	Gahb Gaew	1458	Lowland rice	Northern	Mueang	Lampang	18.4209	99.6141	Glutinous	Indica II	2	Group I	0.541	0.458	0.001
LN35	Daw Nok Gaen	1468	Lowland rice	Northern	Mueang	Lampang	18.3686	99.5765	Glutinous	Indica II	2	Group II	0.2	0.798	0.002
LN36	Wi	1471	Lowland rice	Northern	Mueang	Lampang	18.3574	99.5984	Non-glutinous	Indica I	1	Group I	0.653	0.345	0.002
LN37	Dawk Pud Yahng	1473	Lowland rice	Northern	Mueang	Lampang	18.3456	99.5639	Glutinous	Indica II	2	Group II	0.003	0.994	0.003
LN38	Niaw San-pah-tawng	1484	Lowland rice	Northern	Mueang	Lampang	18.324	99.5402	Glutinous	Indica II	2	Group II	0.002	0.997	0.001
LN39	Ma-tan	1487	Lowland rice	Northern	Mueang	Lampang	18.3331	99.5167	Glutinous	Indica II	2	Group II	0.036	0.96	0.004
LN40	Lai Lah	2120	Lowland rice	Northern	San Pa Tong	Chiang Mai	18.6383	98.8666	Glutinous	Indica II	2	Group II	0.004	0.992	0.004
LN41	Leb Pay	2934	Lowland rice	Northern	San Pa Tong	Chiang Mai	18.6182	98.8503	Non-glutinous	Indica II	2	Group II	0.003	0.954	0.043
LN42	Daw Mah-na	3101	Lowland rice	Northern	San Pa Tong	Chiang Mai	18.6015	98.8466	Glutinous	Indica I	2	Group II	0.065	0.934	0.001
LN43	Khae-maew	3105	Lowland rice	Northern	Khun Yuam	Mae Hong Son	18.8505	97.9362	Non-glutinous	Indica II	2	Group II	0.25	0.71	0.04
LN44	Leuang Hawm	3131	Lowland rice	Northern	Phan	Chiang Rai	19.5637	99.7833	Glutinous	Indica I	2	Group II	0.053	0.946	0.001
LN45	Khao' Ti	3134	Lowland rice	Northern	Mae Suai	Chiang Rai	19.6076	99.4827	Glutinous	Indica II	2	Group II	0.003	0.995	0.002
LN46	Mae Hahng	3141	Lowland rice	Northern	Mueang	Lampang	18.3467	99.525	Glutinous	Indica I	2	Group II	0.054	0.945	0.001
LN47	Lai Luang	3167	Lowland rice	Northern	Wiang Sa	Nan	18.5632	100.771	Glutinous	Indica II	2	Group II	0.006	0.991	0.003
LN48	Ma-hah Wong	3173	Lowland rice	Northern	Pua	Nan	19.1713	100.814	Glutinous	Indica II	2	Group II	0.002	0.993	0.005
LN49	Pah Gong Noi	3177	Lowland rice	Northern	Pua	Nan	19.0043	100.935	Glutinous	Indica II	2	Group II	0.003	0.99	0.007
LN50	Daw Hawm	3178	Lowland rice	Northern	Pua	Nan	19.2432	100.929	Glutinous	Indica I	2	Group II	0.019	0.98	0.001
LNE01	Nahng Tom	605	Lowland rice	Northeastern	Mueang	Surin	15.0944	103.489	Non-glutinous	Indica I	2	Group II	0.275	0.723	0.001
LNE02	Niaw Khao	607	Lowland rice	Northeastern	Mueang	Surin	14.9699	103.492	Non-glutinous	Indica II	2	Group II	0.242	0.74	0.018
LNE03	Niaw San-pah-tawng	622	Lowland rice	Northeastern	Mueang	Surin	14.8365	103.558	Glutinous	Indica II	2	Group II	0.211	0.785	0.004
LNE04	Khi Tom Hawm	2720	Lowland rice	Northeastern	Det Udom	Ubon Ratchathani	14.872	105.025	Glutinous	Indica II	2	Group II	0.058	0.94	0.002
LNE05	Hawm Pa-mah	3210	Lowland rice	Northeastern	Wang Saphung	Loei	17.1534	101.948	Glutinous	Indica II	2	Group II	0.003	0.995	0.002
LNE06	Gaen Jan	3247	Lowland rice	Northeastern	Non Sa-at	Udon Thani	17.0642	102.75	Glutinous	Indica II	2	Group II	0.003	0.996	0.001
LNE07	E-Tawd	3248	Lowland rice	Northeastern	Non Sa-at	Udon Thani	17.0392	102.789	Glutinous	Indica II	2	Group II	0.003	0.994	0.003
LNE08	Leuang Tawng	3249	Lowland rice	Northeastern	Non Sa-at	Udon Thani	16.9941	102.835	Non-glutinous	Indica I	1	Group I	0.572	0.426	0.002
LNE09	E-Long Mah	3255	Lowland rice	Northeastern	Non Sa-at	Udon Thani	16.8939	102.971	Glutinous	Indica I	1	Group I	0.835	0.163	0.002
LNE10	Goo Kam	3268	Lowland rice	Northeastern	Kantharawichai	Maha Sarakham	16.3594	103.241	Glutinous	Indica II	2	Group II	0.002	0.995	0.003
LNE11	Daw Hawm	3269	Lowland rice	Northeastern	Kantharawichai	Maha Sarakham	16.2122	103.186	Glutinous	Indica II	2	Group II	0.009	0.99	0.001
LNE12	Hawm Nahng Nuan	3270	Lowland rice	Northeastern	Yang Talat	Kalasin	16.4428	103.219	Glutinous	Intermediate	2	Group II	0.239	0.76	0.001
LNE13	E-Pun	3327	Lowland rice	Northeastern	Mancha Khiri	Khon Kaen	16.2198	102.552	Glutinous	Indica II	2	Group II	0.004	0.995	0.001
LNE14	Khao Gung	3358	Lowland rice	Northeastern	Mueang	Ubon Ratchathani	15.3357	104.849	Glutinous	Indica II	2	Group II	0.005	0.994	0.001
LNE15	Khao	3361	Lowland rice	Northeastern	Muang Sam Sip	Ubon Ratchathani	15.5281	104.725	Glutinous	Indica II	2	Group II	0.002	0.996	0.002
LNE16	Khao Set-ti	3366	Lowland rice	Northeastern	Phibun Mangsahan	Ubon Ratchathani	15.1127	105.205	Glutinous	Indica II	2	Group II	0.003	0.996	0.001
LNE17	Khao' Gam	3369	Lowland rice	Northeastern		Ubon Ratchathani			Glutinous	Indica II	2	Group II	0.036	0.962	0.001
LNE18	Hawm Meud	4068	Lowland rice	Northeastern	Phang Khon	Sakon Nakhon	17.3903	103.743	Glutinous	Indica II	2	Group II	0.018	0.981	0.001
LNE19	Hawm Ka-set	4087	Lowland rice	Northeastern	Yang Talat	Kalasin	16.4047	103.226	Glutinous	Indica II	2	Group II	0.03	0.968	0.002
LNE20	Niaw Hawm Mali	4489	Lowland rice	Northeastern	Nong Han	Udon Thani	17.3694	103.085	Glutinous	Indica II	2	Group II	0.028	0.97	0.002
LNE21	Niaw Loi	4496	Lowland rice	Northeastern	Nong Han	Udon Thani	17.46	103.113	Glutinous	Indica II	1	Group I	0.726	0.152	0.121
LNE22	Khao' Hawm	4813	Lowland rice	Northeastern	Prakhon Chai	Buriram	14.646	103.035	Non-glutinous	Indica I	2	Group I	0.639	0.359	0.002
LNE23	Khao' Hawm	4819	Lowland rice	Northeastern	Borabue	Maha Sarakham	16.016	103.108	Non-glutinous	Indica I	2	Group I	0.563	0.436	0.002
LNE24	Khao' Hawm	4842	Lowland rice	Northeastern	Mueang	Roi Et	16.0469	103.61	Non-glutinous	Indica I	2	Group I	0.666	0.332	0.002
LNE25	E-Dahng	5601	Lowland rice	Northeastern	Kut Khaopun	Ubon Ratchathani	15.8587	105.023	Glutinous	Indica II	2	Group II	0.003	0.995	0.003
LNE26	Hawm Tung	5624	Lowland rice	Northeastern	Khueang Nai	Ubon Ratchathani	15.4045	104.529	Glutinous	Indica II	2	Group II	0.005	0.994	0.001
LNE27	Daw Daeng	5648	Lowland rice	Northeastern	Kham Khuean Kaeo	Yasothon	15.6613	104.332	Non-glutinous	Indica I	1	Group II	0.443	0.535	0.022
LNE28	Khao Gung	5671	Lowland rice	Northeastern	Maha Chana Chai	Yasothon	15.5097	104.235	Glutinous	Indica I	2	Group II	0.497	0.501	0.002
LNE29	Nahng Nuan	5729	Lowland rice	Northeastern	Chonnabot	Khon Kaen	16.0209	102.549	Glutinous	Intermediate	2	Group II	0.172	0.827	0.002
LNE30	Leuang Awn	5808	Lowland rice	Northeastern	Non Thai	Nakhon Ratchasima	15.1047	102.053	Non-glutinous	Indica I	1	Group I	0.95	0.049	0.002
LNE31	Khao Mali	5826	Lowland rice	Northeastern	Bamnet Narong	Chaiyaphum	15.4693	101.674	Non-glutinous	Indica II	2	Group II	0.003	0.996	0.001
LNE34	Hahng Yi 71	7613	Lowland rice	Northeastern	Mueang	Nakhon Phanom	17.356	104.625	Glutinous	Indica II	2	Group II	0.005	0.993	0.002
LNE35	Khi Tom Kam-nan	7627	Lowland rice	Northeastern	Yang Talat	Kalasin	16.427	103.32	Glutinous	Indica II	2	Group II	0.076	0.919	0.005
LNE36	Hawm Pah Sew	7655	Lowland rice	Northeastern	Huai Mek	Kalasin	16.5726	103.328	Glutinous	Indica II	2	Group II	0.177	0.819	0.004
LNE37	Hawm Phae Pa-lo	7672	Lowland rice	Northeastern	Huai Mek	Kalasin	16.624	103.212	Glutinous	Intermediate	2	Group II	0.342	0.656	0.002
LNE38	Khao Nak	7971	Lowland rice	Northeastern	Chok Chai	Nakhon Ratchasima	14.871	102.24	Non-glutinous	Indica I	1	Group I	0.76	0.236	0.004
LNE39	Leuang Lai	7983	Lowland rice	Northeastern	Khon Buri	Nakhon Ratchasima	14.4496	102.198	Non-glutinous	Indica I	1	Group I	0.996	0.003	0.001
LNE40	Bak-muay	7997	Lowland rice	Northeastern	Chatturat	Chaiyaphum	15.6856	101.792	Glutinous	Indica II	2	Group II	0.013	0.95	0.037
LNE41	Daeng Luang	10669	Lowland rice	Northeastern	Mueang	Mukdahan	16.6206	104.582	Glutinous	Indica II	2	Group II	0.007	0.992	0.002
LNE42	Khao' Pa-mah	10670	Lowland rice	Northeastern	Khamcha-I	Mukdahan	16.6185	104.381	Glutinous	Indica II	2	Group II	0.003	0.996	0.001
LNE43	Pra-in	10677	Lowland rice	Northeastern	Dong Luang	Mukdahan	16.8281	104.128	Glutinous	Indica II	2	Group II	0.002	0.996	0.002
LNE44	Khao Gung	10684	Lowland rice	Northeastern	Nikhom Kham Soi	Mukdahan	16.2532	104.62	Glutinous	Indica II	2	Group II	0.003	0.996	0.001
LNE45	Ma-ue	10689	Lowland rice	Northeastern	Dong Luang	Mukdahan	16.8622	104.216	Glutinous	Indica II	2	Group II	0.006	0.992	0.001
LNE46	E-Gaw	10693	Lowland rice	Northeastern	Dong Luang	Mukdahan	16.8219	104.274	Glutinous	Indica II	2	Group II	0.004	0.995	0.002
LNE47	Dawk Rim	12154	Lowland rice	Northeastern	Kut Chum	Yasothon	16.134	104.184	Glutinous	Indica II	2	Group II	0.003	0.995	0.002
LNE48	Daw Khao	12155	Lowland rice	Northeastern	Kut Chum	Yasothon	15.9627	104.375	Glutinous	Indica II	2	Group II	0.003	0.995	0.001
LNE49	Leuang Gahng	12498	Lowland rice	Northeastern	Phu Khiao	Chaiyaphum	16.3551	102.144	Non-glutinous	Indica I	1	Group I	0.947	0.051	0.002
LNE50	Maeng Dan	13996	Lowland rice	Northeastern	Mueang	Mukdahan	16.4672	104.687	Glutinous	Indica II	2	Group II	0.003	0.996	0.001
LS01	Hawm Jan	1765	Lowland rice	Southern	Khao Chaison	Phatthalung	7.44966	100.079	Non-glutinous	Indica I	1	Group I	0.995	0.003	0.002
LS02	Toon	1769	Lowland rice	Southern	Khao Chaison	Phatthalung	7.48025	100.083	Non-glutinous	Indica I	1	Group I	0.985	0.014	0.001
LS03	Sai Khao	1770	Lowland rice	Southern	Khuan Khanun	Phatthalung	7.85228	99.9872	Non-glutinous	Indica I	1	Group I	0.679	0.317	0.004
LS04	Daeng Chai Ta-lay	4105	Lowland rice	Southern	Mueang	Phatthalung	7.71943	100.102	Non-glutinous	Indica I	1	Group I	0.995	0.003	0.002
LS05	Nahng Gai	4145	Lowland rice	Southern	Mueang	Phatthalung	7.68937	100.072	Non-glutinous	Indica I	1	Group I	0.996	0.002	0.001
LS06	Sai Khao	4175	Lowland rice	Southern	Khao Chaison	Phatthalung	7.46679	100.106	Non-glutinous	Indica I	1	Group I	0.996	0.003	0.001
LS07	Nawn Hak	4198	Lowland rice	Southern	Khao Chaison	Phatthalung	7.467	100.193	Non-glutinous	Indica I	1	Group I	0.994	0.004	0.001
LS08	Gaw-lae	4208	Lowland rice	Southern	Khao Chaison	Phatthalung	7.48735	100.2	Non-glutinous	Indica I	1	Group I	0.997	0.002	0.001
LS09	Mae Hawm	4216	Lowland rice	Southern	Pak Phayun	Phatthalung	7.25464	100.314	Non-glutinous	Indica I	1	Group I	0.995	0.003	0.002
LS10	Chawng Ri	4219	Lowland rice	Southern	Tamot	Phatthalung	7.29396	100.055	Non-glutinous	Indica I	1	Group I	0.996	0.003	0.001
LS11	Yah-sai	4254	Lowland rice	Southern	Pak Phayun	Phatthalung	7.29287	100.232	Non-glutinous	Indica I	1	Group I	0.995	0.003	0.001
LS12	Khao Bow	4295	Lowland rice	Southern	Mueang	Satun	6.71642	100.06	Non-glutinous	Indica I	1	Group I	0.996	0.003	0.001
LS13	Khao' Gerd	4313	Lowland rice	Southern	Mueang	Satun	6.77004	100.029	Non-glutinous	Indica II	2	Group II	0.282	0.621	0.097
LS14	Khao Look Wai	4315	Lowland rice	Southern	Mueang	Satun	6.68991	100.06	Non-glutinous	Indica II	1	Group I	0.701	0.297	0.002
LS15	Niaw Look Pueng	4318	Lowland rice	Southern	Mueang	Satun	6.66945	100.104	Glutinous	Indica I	1	Group I	0.979	0.018	0.003
LS16	Hawm Jan	4371	Lowland rice	Southern	Thung Yai	Nakhon Si Thammarat	8.34285	99.4474	Non-glutinous	Indica II	1	Group I	0.506	0.49	0.003
LS17	Hua Nah	4524	Lowland rice	Southern	Mueang	Phatthalung	7.6476	100.078	Non-glutinous	Indica I	1	Group I	0.996	0.004	0.001
LS18	Bow Nam Kahng	4539	Lowland rice	Southern	Khuan Khanun	Phatthalung	7.80644	100.055	Non-glutinous	Indica I	1	Group I	0.92	0.004	0.076
LS19	Hawm Jan	4561	Lowland rice	Southern	Ao Luek	Krabi	8.42658	98.7237	Non-glutinous	Indica I	1	Group I	0.991	0.006	0.003
LS20	Pa-yah Yud Chang	4663	Lowland rice	Southern	Thung Tako	Chumphon	10.1279	99.0239	Non-glutinous	Indica I	1	Group I	0.997	0.002	0.001
LS21	Hua Nah	5206	Lowland rice	Southern	Khok Pho	Pattani	6.77051	101.063	Non-glutinous	Indica I	1	Group I	0.993	0.003	0.003
LS22	Look Chang	5209	Lowland rice	Southern	Khok Pho	Pattani	6.62525	101.195	Non-glutinous	Indica I	1	Group I	0.995	0.004	0.001
LS24	Sang Yod	7000	Lowland rice	Southern	Thung Yai	Nakhon Si Thammarat	8.18091	99.3482	Non-glutinous	Indica I	1	Group I	0.994	0.005	0.001
LS25	Hawm Jan	7009	Lowland rice	Southern	Mueang	Nakhon Si Thammarat	8.4618	100.012	Non-glutinous	Indica I	1	Group I	0.993	0.004	0.004
LS26	Hawm Jan	7032	Lowland rice	Southern	Ron Phibun	Nakhon Si Thammarat	8.16329	99.8969	Non-glutinous	Indica I	1	Group I	0.996	0.003	0.001
LS27	Khao' Hawm	7064	Lowland rice	Southern	Chian Yai	Nakhon Si Thammarat	8.19058	100.167	Non-glutinous	Indica I	1	Group I	0.995	0.003	0.002
LS28	Hawm Jan	7065	Lowland rice	Southern	Ron Phibun	Nakhon Si Thammarat	8.14516	99.9456	Non-glutinous	Indica I	1	Group I	0.997	0.002	0.001
LS29	Khao' Nok	7401	Lowland rice	Southern	Khok Pho	Pattani	6.64933	101.182	Non-glutinous	Indica I	1	Group I	0.989	0.005	0.006
LS30	Hawng Tawng	9673	Lowland rice	Southern	Lang Suan	Chumphon	9.8984	99.0248	Non-glutinous	Indica I	1	Group I	0.996	0.004	0.001
LS31	Niaw Hawm Dam	9747	Lowland rice	Southern	Tha Sala	Nakhon Si Thammarat	8.7141	99.8722	Glutinous	Indica I	1	Group I	0.69	0.304	0.006
LS32	Hawm	9862	Lowland rice	Southern	Ra-ngae	Narathiwat	6.2591	101.753	Non-glutinous	Indica I	1	Group I	0.995	0.003	0.002
LS33	Puang Wai	9943	Lowland rice	Southern	Khok Pho	Pattani	6.71359	101.187	Non-glutinous	Indica I	1	Group I	0.992	0.007	0.001
LS34	Look Daeng	9969	Lowland rice	Southern	Nong Chik	Pattani	6.71749	101.222	Non-glutinous	Indica I	1	Group I	0.991	0.007	0.002
LS35	Nuay Kheua	10251	Lowland rice	Southern	Khuan Khanun	Phatthalung	7.74287	100.025	Non-glutinous	Indica I	1	Group I	0.989	0.008	0.003
LS36	Bow Hawm	10396	Lowland rice	Southern	Sikao	Trang	7.56635	99.4068	Non-glutinous	Indica I	1	Group I	0.993	0.005	0.002
LS37	Pin Gaew	10406	Lowland rice	Southern	Huai Yot	Trang	7.7497	99.4909	Non-glutinous	Indica I	1	Group I	0.993	0.006	0.001
LS38	Pin Gaew Bow	14441	Lowland rice	Southern	Lan Saka	Nakhon Si Thammarat	8.38015	99.8164	Non-glutinous	Indica I	1	Group I	0.996	0.003	0.002
LS39	Niaw Tahn	14450	Lowland rice	Southern	Chaiya	Surat Thani	9.38506	99.2185	Glutinous	Japonica II	3	Group III	0.001	0.001	0.998
LS40	Hawm Mali	15541	Lowland rice	Southern	Thap Put	Phang Nga	8.44015	98.6513	Non-glutinous	Indica I	2	Group I	0.55	0.448	0.002
LS41	Chang Um	16737	Lowland rice	Southern	Mueang	Phatthalung	7.64658	100.078	Non-glutinous	Indica I	1	Group I	0.997	0.002	0.001
LS42	Bow Look Wai	16898	Lowland rice	Southern	Mueang	Phuket	7.94752	98.3641	Non-glutinous	Indica I	1	Group I	0.994	0.005	0.001
LS43	Hawm Look Khuey	17339	Lowland rice	Southern	Mueang	Phatthalung	7.45207	100.144	Non-glutinous	Indica I	1	Group I	0.996	0.003	0.001
LS44	Leuang Awn	19544	Lowland rice	Southern	Mueang	Phang Nga	8.50619	98.5009	Non-glutinous	Indica I	1	Group I	0.996	0.002	0.002
LS45	Tawng Hawm	20318	Lowland rice	Southern	Pak Phayun	Phatthalung	7.33553	100.341	Non-glutinous	Indica I	1	Group I	0.991	0.005	0.005
LS46	Hawm Chai Yah	20811	Lowland rice	Southern	Chaiya	Surat Thani	9.41574	99.1568	Non-glutinous	Indica II	2	Group II	0.244	0.712	0.044
LS47	Leb Nok Pattani	21962	Lowland rice	Southern	Khuan Khanun	Phatthalung	7.72707	100.082	Non-glutinous	Indica I	1	Group I	0.996	0.002	0.002
LS48	Look Daeng Pattani	21963	Lowland rice	Southern	Khuan Khanun	Phatthalung	7.69032	99.962	Non-glutinous	Indica I	1	Group I	0.991	0.007	0.002
LS49	Chiang Phatthalung	21964	Lowland rice	Southern	Khuan Khanun	Phatthalung	7.71445	99.9371	Non-glutinous	Indica I	1	Group I	0.993	0.006	0.001
LS50	Chiang	21976	Lowland rice	Southern	Cha-uat	Nakhon Si Thammarat	8.13749	99.9388	Non-glutinous	Indica I	1	Group I	0.993	0.006	0.001
UC01	PW273	667	Upland rice	Central					Non-glutinous	Indica I	1	Group I	0.541	0.456	0.004
UC02	Khao' Pa-mah	886	Upland rice	Central	Bang Khen	Bangkok	13.8513	100.573	Non-glutinous	Indica I	1	Group I	0.753	0.246	0.001
UC03	55NM S-4Neu	1503	Upland rice	Central	Mueang	Suphan Buri	14.5039	100.057	Non-glutinous	Indica I	1	Group II	0.377	0.621	0.002
UC04	Khao' Daeng	3668	Upland rice	Central	Ban Rai	Uthai Thani	15.0281	99.6426	Glutinous	Japonica I	3	Group III	0.001	0.001	0.998
UC05	Leuang	3765	Upland rice	Central	Mueang	Nakhon Pathom	13.8228	100.123	Non-glutinous	Indica I	1	Group I	0.989	0.004	0.007
UC06	Hawm On	4410	Upland rice	Central	Bang Khen	Bangkok	13.8513	100.573	Glutinous	Indica II	2	Group II	0.002	0.997	0.001
UC07	Hawm Bai	5459	Upland rice	Central	Sam Ngam	Phichit	16.4487	100.2	Non-glutinous	Indica II	2	Group II	0.002	0.997	0.001
UC08	Loi Hah Ruang	6230	Upland rice	Central	Photharam	Ratchaburi	13.6865	99.8413	Non-glutinous	Indica I	1	Group I	0.873	0.004	0.123
UC09	Leuang Gra-bang	6390	Upland rice	Central	Nakhon Thai	Phitsanulok	17.0776	100.761	Non-glutinous	Indica I	2	Group II	0.209	0.79	0.002
UC10	Puang Tawng	6544	Upland rice	Central	Tha Wung	Lopburi	14.7956	100.503	Non-glutinous	Indica I	1	Group I	0.861	0.136	0.004
UC11	Khao' Daeng	6871	Upland rice	Central	Dan Chang	Suphan Buri	14.9607	99.3727	Non-glutinous	Indica I	1	Group I	0.6	0.375	0.025
UC12	Khao' Khamen	6925	Upland rice	Central	Dan Chang	Suphan Buri	14.9278	99.635	Non-glutinous	Indica I	1	Group II	0.425	0.573	0.002
UC13	Auey-wawng-pu-dung	8077	Upland rice	Central	Suan Phueng	Ratchaburi	13.5418	99.4145	Non-glutinous	Japonica II	3	Group III	0.001	0.001	0.998
UC14	Puey-toi	8082	Upland rice	Central	Suan Phueng	Ratchaburi	13.6002	99.4162	Non-glutinous	Indica I	1	Group I	0.863	0.135	0.002
UC15	Bueng Wo	8088	Upland rice	Central	Suan Phueng	Ratchaburi	13.5948	99.4412	Non-glutinous	Japonica I	3	Group III	0.001	0.001	0.998
UC16	Ai Tai	8100	Upland rice	Central	Suan Phueng	Ratchaburi	13.5555	99.4263	Glutinous	Japonica II	3	Group III	0.001	0.002	0.997
UC17	Bueng-eng-wawng-ua	8104	Upland rice	Central	Suan Phueng	Ratchaburi	13.5009	99.2804	Non-glutinous	Indica I	1	Group I	0.986	0.013	0.001
UC18	Ai-khow-pay	8123	Upland rice	Central	Dan Chang	Suphan Buri	14.9702	99.6592	Glutinous	Indica II	2	Group II	0.002	0.996	0.002
UC19	Beu-ua Poo	8135	Upland rice	Central	Dan Chang	Suphan Buri	14.9621	99.3718	Glutinous	Indica II	2	Group II	0.002	0.997	0.001
UC20	Neua Phrae	8145	Upland rice	Central	Dan Chang	Suphan Buri	14.8434	99.5829	Glutinous	Indica II	2	Group II	0.002	0.997	0.001
UC21	Beu-bawng	8155	Upland rice	Central	Dan Chang	Suphan Buri	14.901	99.6689	Non-glutinous	Japonica I	3	Group III	0.001	0.001	0.998
UC22	Ai-khao-pay	8163	Upland rice	Central	Dan Chang	Suphan Buri	14.896	99.7388	Non-glutinous	Indica II	2	Group II	0.003	0.995	0.003
UC23	Khao A-wa-gaht	8944	Upland rice	Central	Nong Chang	Uthai Thani	15.3649	99.7641	Non-glutinous	Indica I	1	Group I	0.974	0.024	0.002
UC24	Khao Dawk Mali	11069	Upland rice	Central	Sai Yok	Kanchanaburi	14.24	99.0229	Non-glutinous	Indica I	1	Group I	0.972	0.026	0.002
UC25	Pra-perng	11457	Upland rice	Central	Sangkhla Buri	Kanchanaburi	15.1672	98.3497	Non-glutinous	Indica II	2	Group II	0.031	0.967	0.002
UC26	Hawm Dong	11467	Upland rice	Central	Si Sawat	Kanchanaburi	14.5483	98.9869	Non-glutinous	Indica II	2	Group II	0.002	0.997	0.001
UC27	Leuang Hai	11565	Upland rice	Central	Si Sawat	Kanchanaburi	14.929	99.2808	Non-glutinous	Indica I	1	Group II	0.474	0.524	0.001
UC29	Po Bai Si	14294	Upland rice	Central	Bang Mun Nak	Phichit	16.0195	100.443	Non-glutinous	Indica I	1	Group I	0.984	0.015	0.001
UC30	Hin Gawng	14296	Upland rice	Central	Pho Thale	Phichit	16.1342	100.25	Non-glutinous	Indica I	1	Group I	0.937	0.061	0.002
UC31	Ta-pow Lom	14297	Upland rice	Central	Pho Thale	Phichit	15.9652	100.217	Non-glutinous	Intermediate	1	Group I	0.511	0.487	0.002
UC33	Peuak Khao	19681	Upland rice	Central	Nakhon Thai	Phitsanulok	17.0537	100.915	Non-glutinous	Indica I	1	Group II	0.456	0.512	0.032
UC36	Yahw Hai	21418	Upland rice	Central	Sangkhla Buri	Kanchanaburi	15.1107	98.3817	Non-glutinous	Indica I	1	Group I	0.846	0.148	0.006
UC37	Beu-ner-ber	21825	Upland rice	Central	Sangkhla Buri	Kanchanaburi	15.1664	98.466	Non-glutinous	Indica II	2	Group II	0.009	0.99	0.001
UC38	Ai Liaw	21829	Upland rice	Central	Sangkhla Buri	Kanchanaburi	15.1842	98.3264	Glutinous	Indica II	2	Group II	0.003	0.993	0.004
UC40	Jao Khao	22327	Upland rice	Central	Chat Trakan	Phitsanulok	17.2266	100.495	Non-glutinous	Indica I	1	Group I	0.383	0.293	0.324
UC44	Leuang Rai	22931	Upland rice	Central		Nakhon Sawan			Non-glutinous	Indica I	1	Group I	0.578	0.42	0.002
UC45	Poo Yai Li	22932	Upland rice	Central		Nakhon Sawan			Non-glutinous	Indica I	1	Group I	0.669	0.324	0.007
UC46	Hawm Mali Rai	23073	Upland rice	Central	Thong Pha Phum	Kanchanaburi	14.558	98.7602	Non-glutinous	Indica I	1	Group I	0.757	0.241	0.002
UC47	Pa-per	23083	Upland rice	Central	Sangkhla Buri	Kanchanaburi	15.2108	98.312	Non-glutinous	Indica II	2	Group II	0.077	0.922	0.001
UC48	Khao' Daeng	23084	Upland rice	Central	Sangkhla Buri	Kanchanaburi	15.2213	98.3704	Non-glutinous	Indica I	1	Group I	0.914	0.012	0.074
UN01	Daw Hawm 26	421	Upland rice	Northern	San Pa Tong	Chiang Mai	18.5887	98.8565	Glutinous	Indica II	2	Group II	0.015	0.96	0.025
UN02	Niaw San-pah-tawng	1370	Upland rice	Northern	Mueang	Chiang Rai	19.8454	99.7726	Glutinous	Indica II	2	Group II	0.002	0.996	0.002
UN03	Hao	1385	Upland rice	Northern	Mueang	Lampang	18.3507	99.5336	Glutinous	Indica I	1	Group I	0.757	0.241	0.002
UN04	Dawk Pud	1452	Upland rice	Northern	Mueang	Lampang	18.3605	99.5415	Glutinous	Indica II	2	Group II	0.003	0.996	0.001
UN05	E-Lung	1501	Upland rice	Northern	Mueang	Lampang	18.372	99.564	Glutinous	Indica II	1	Group I	0.628	0.369	0.003
UN06	Gai Hai	1502	Upland rice	Northern	Mueang	Lampang	18.3859	99.6042	Glutinous	Indica II	2	Group II	0.213	0.785	0.002
UN07	Phrae Nai Khao	1831	Upland rice	Northern	Mueang	Chiang Mai	18.8761	98.9947	Non-glutinous	Indica II	2	Group II	0.241	0.757	0.001
UN09	Law	1840	Upland rice	Northern	Mueang	Chiang Mai	18.7309	98.981	Non-glutinous	Indica II	1	Group I	0.492	0.353	0.155
UN10	Khao Reng	3084	Upland rice	Northern	Mueang	Mae Hong Son	19.289	97.9518	Non-glutinous	Intermediate	1	Group I	0.788	0.211	0.001
UN11	Hawm Mae-jo	4446	Upland rice	Northern		Chiang Rai			Glutinous	Indica I	1	Group I	0.995	0.004	0.001
UN12	Ma-wai	4457	Upland rice	Northern		Chiang Rai			Glutinous	Indica II	2	Group II	0.003	0.792	0.205
UN13	Feuang Kam	5127	Upland rice	Northern	Song	Phrae	18.7749	100.296	Glutinous	Indica II	2	Group II	0.003	0.995	0.002
UN14	Daw Lao	5133	Upland rice	Northern	Mueang	Phrae	18.1353	100.108	Glutinous	Indica II	2	Group II	0.04	0.956	0.004
UN15	Long Khi Lai	5147	Upland rice	Northern	Song	Phrae	18.744	100.312	Glutinous	Indica II	2	Group II	0.002	0.994	0.004
UN16	Hawm Tawng	5149	Upland rice	Northern	Song	Phrae	18.6878	100.325	Glutinous	Indica I	2	Group II	0.056	0.943	0.001
UN17	Feuang Ngahm	5151	Upland rice	Northern	Mueang	Phrae	18.1565	100.119	Glutinous	Indica II	2	Group II	0.006	0.993	0.001
UN18	Say	5152	Upland rice	Northern	Song	Phrae	18.4297	100.164	Glutinous	Indica II	2	Group II	0.003	0.994	0.003
UN19	Daw Hawm	5158	Upland rice	Northern	Mueang	Phrae	18.1842	100.16	Glutinous	Indica II	2	Group II	0.003	0.994	0.003
UN20	Daw Hawm	5171	Upland rice	Northern	Mueang	Phrae	18.2336	100.157	Glutinous	Indica II	2	Group II	0.003	0.995	0.002
UN21	Daw Hawm	5249	Upland rice	Northern	Doi Saket	Chiang Mai	18.8605	99.1605	Glutinous	Indica II	2	Group II	0.015	0.984	0.001
UN22	Sew Daeng	6652	Upland rice	Northern	Wang Chin	Phrae	17.7938	99.4908	Glutinous	Indica II	2	Group II	0.003	0.995	0.002
UN23	Jao Hawm	6981	Upland rice	Northern	San Pa Tong	Chiang Mai	18.6226	98.862	Non-glutinous	Indica II	1	Group II	0.369	0.629	0.002
UN24	Gra-Teuan Daeng	7529	Upland rice	Northern	Mae Chaem	Chiang Mai	18.5048	98.3499	Non-glutinous	Japonica I	3	Group III	0.001	0.001	0.998
UN25	Say-Sa	11702	Upland rice	Northern	Song	Phrae	18.359	100.195	Glutinous	Indica II	2	Group II	0.004	0.995	0.001
UN26	Long Khi Kwai	11736	Upland rice	Northern	Wang Chin	Phrae	17.952	99.6023	Glutinous	Indica II	2	Group II	0.009	0.99	0.001
UN27	Leb Chahng	17656	Upland rice	Northern	Mueang	Phayao	19.1201	99.8707	Glutinous	Indica II	2	Group II	0.008	0.991	0.001
UN28	Leuang	17739	Upland rice	Northern	Mueang	Lamphun	18.5511	99.0611	Glutinous	Indica II	2	Group II	0.007	0.99	0.002
UN29	Niaw Lai	19676	Upland rice	Northern	Khao Kho	Phetchabun	16.7503	101.008	Non-glutinous	Japonica I	3	Group III	0.008	0.06	0.931
UN31	Khao' Hao	19753	Upland rice	Northern	Hang Dong	Chiang Mai	18.676	98.9516	Glutinous	Indica II	2	Group II	0.003	0.995	0.002
UN33	Ja-te	21512	Upland rice	Northern		Chiang Rai			Non-glutinous	Japonica I	3	Group III	0.001	0.001	0.998
UN34	Aw-mae Mah	21514	Upland rice	Northern	Mae Fa Luang	Chiang Rai	20.3497	99.5052	Non-glutinous	Intermediate	2	Group II	0.032	0.966	0.002
UN35	Ja-naw Beu	21524	Upland rice	Northern	Mae Fa Luang	Chiang Rai	20.3413	99.5146	Glutinous	Indica II	2	Group II	0.003	0.994	0.003
UN36	Biaw Giam Siaw	21543	Upland rice	Northern	Pong	Phayao	19.2429	100.351	Non-glutinous	Japonica I	3	Group III	0.001	0.001	0.998
UN37	Ben Bood	21548	Upland rice	Northern	Pong	Phayao	19.0815	100.266	Glutinous	Japonica I	3	Group III	0.001	0.001	0.998
UN38	Ben-La-Goo-Go	21549	Upland rice	Northern	Pong	Phayao	19.1059	100.383	Glutinous	Japonica I	3	Group III	0.001	0.001	0.998
UN39	Ben Glaw	21557	Upland rice	Northern	Mae Fa Luang	Chiang Rai	20.326	99.5402	Glutinous	Japonica I	3	Group III	0.001	0.001	0.998
UN41	Leuang Pra-than Yai Wai	22359	Upland rice	Northern	Mueang	Phrae	18.2332	100.202	Non-glutinous	Indica I	1	Group I	0.972	0.026	0.002
UN42	Mali 3	22365	Upland rice	Northern	Mueang	Phrae	18.1979	100.253	Non-glutinous	Indica I	1	Group I	0.955	0.043	0.002
UN43	Li Saw	22399	Upland rice	Northern	Mueang	Phrae	18.1213	100.21	Glutinous	Indica II	2	Group II	0.003	0.995	0.001
UN44	Gam	22416	Upland rice	Northern	Mueang	Phrae	18.1035	100.178	Glutinous	Indica II	2	Group II	0.013	0.982	0.005
UN45	Gam Ti	22423	Upland rice	Northern	Mueang	Phrae	18.1235	100.185	Glutinous	Indica II	2	Group II	0.017	0.981	0.002
UN46	Khao' Pik	23006	Upland rice	Northern		Chiang Rai	18.4689	98.3738	Glutinous	Japonica I	3	Group III	0.001	0.002	0.997
UN47	Ben-Jo	23012	Upland rice	Northern	Mae Chaem	Chiang Mai			Non-glutinous	Japonica I	3	Group III	0.001	0.002	0.997
UN48	Khao' Phrae	23145	Upland rice	Northern	Mae Rim	Chiang Mai	20.2786	99.5903	Glutinous	Indica II	2	Group II	0.003	0.996	0.002
UN49	Ja-nu-nae-nae	23163	Upland rice	Northern	Phrao	Chiang Mai	19.313	99.1985	Non-glutinous	Japonica I	3	Group III	0.001	0.001	0.997
UN50	Beu-wah	23165	Upland rice	Northern	Chai Prakan	Chiang Mai	19.756	99.138	Non-glutinous	Indica II	2	Group II	0.247	0.714	0.039
UNE01	Khao' Hao	1664	Upland rice	Northeastern	Mueang	Khon Kaen	16.586	102.721	Glutinous	Indica I	1	Group II	0.494	0.502	0.004
UNE02	Niaw Dam	1872	Upland rice	Northeastern	Mueang	Khon Kaen	16.4874	102.8	Glutinous	Indica II	2	Group II	0.393	0.529	0.078
UNE03	Hawm	1891	Upland rice	Northeastern	Mueang	Khon Kaen	16.3107	102.831	Non-glutinous	Indica I	1	Group I	0.672	0.184	0.143
UNE05	Khao' Hao	3219	Upland rice	Northeastern	Chiang Khan	Loei	17.8014	101.744	Glutinous	Indica II	2	Group II	0.005	0.994	0.001
UNE07	Leuang Sahng	4009	Upland rice	Northeastern	That Phanom	Nakhon Phanom	16.9112	104.686	Glutinous	Indica II	2	Group II	0.002	0.996	0.001
UNE08	E-Meu	4475	Upland rice	Northeastern	Nong Han	Udon Thani	17.385	103.215	Glutinous	Indica II	2	Group II	0.003	0.995	0.001
UNE09	E-Neuang	4476	Upland rice	Northeastern	Nong Han	Udon Thani	17.2788	103.119	Glutinous	Indica II	2	Group II	0.005	0.992	0.002
UNE10	Hawm Dong	5787	Upland rice	Northeastern	Bua Yai	Nakhon Ratchasima	15.6304	102.318	Non-glutinous	Indica I	1	Group I	0.786	0.212	0.002
UNE11	Daw Hawm	6718	Upland rice	Northeastern	Mueang	Yasothon	15.8576	104.194	Glutinous	Indica II	2	Group II	0.013	0.986	0.001
UNE12	Hawm Dong	6734	Upland rice	Northeastern	Chatturat	Chaiyaphum	15.4571	101.868	Non-glutinous	Indica II	2	Group II	0.002	0.997	0.001
UNE13	Rahk Haeng	7932	Upland rice	Northeastern	Phimai	Nakhon Ratchasima	15.4499	102.679	Non-glutinous	Indica I	2	Group I	0.658	0.34	0.002
UNE14	Jao Daeng	7956	Upland rice	Northeastern	Bua Yai	Nakhon Ratchasima	15.4996	102.442	Non-glutinous	Indica I	1	Group II	0.478	0.519	0.002
UNE15	Khao' Rai	7962	Upland rice	Northeastern	Mueang	Nakhon Ratchasima	14.992	102.009	Non-glutinous	Indica II	2	Group II	0.002	0.996	0.001
UNE16	Chao Khow	7975	Upland rice	Northeastern	Chok Chai	Nakhon Ratchasima	14.6861	102.232	Non-glutinous	Indica II	2	Group II	0.002	0.996	0.001
UNE18	Grim Gra-chai	10164	Upland rice	Northeastern	Khun Han	Sisaket	14.5693	104.37	Non-glutinous	Indica II	1	Group II	0.474	0.519	0.007
UNE19	Khao	13585	Upland rice	Northeastern	Chum Phae	Khon Kaen	16.7039	101.963	Non-glutinous	Indica I	1	Group I	0.888	0.106	0.006
UNE20	Daeng	13594	Upland rice	Northeastern	Chum Phae	Khon Kaen	16.5046	102.273	Glutinous	Indica II	1	Group II	0.395	0.604	0.002
UNE21	Mahk Yom	13917	Upland rice	Northeastern	Tha Uthen	Nakhon Phanom	17.6102	104.503	Glutinous	Indica II	2	Group II	0.002	0.995	0.003
UNE22	Ga-saen	13966	Upland rice	Northeastern	Dong Luang	Mukdahan	16.8317	104.528	Glutinous	Indica II	2	Group II	0.003	0.995	0.002
UNE23	Phrae	14003	Upland rice	Northeastern	Don Tan	Mukdahan	16.7556	104.531	Glutinous	Indica II	2	Group II	0.002	0.996	0.001
UNE26	Lai	14037	Upland rice	Northeastern	Dan Sai	Loei	17.1039	101.101	Glutinous	Indica II	2	Group II	0.007	0.99	0.003
UNE27	Khao' Puang	14453	Upland rice	Northeastern	Don Phut	Saraburi	14.6353	100.614	Non-glutinous	Indica II	1	Group I	0.981	0.017	0.002
UNE28	Khao Tah Phrae	14464	Upland rice	Northeastern	Don Phut	Saraburi	14.5767	100.624	Non-glutinous	Indica I	1	Group I	0.99	0.008	0.002
UNE29	Hawm Dong	14539	Upland rice	Northeastern	Ban Phaeng	Nakhon Phanom	17.7963	104.21	Non-glutinous	Indica II	2	Group II	0.003	0.994	0.003
UNE30	Chao Khow	15125	Upland rice	Northeastern	Mueang	Loei	17.5435	101.735	Non-glutinous	Indica I	1	Group II	0.445	0.523	0.032
UNE31	Hao	15135	Upland rice	Northeastern	Pak Chom	Loei	17.7378	101.975	Glutinous	Indica II	2	Group II	0.002	0.997	0.001
UNE33	Nahng Nuan	17632	Upland rice	Northeastern	Kaset Wisai	Roi Et	15.7573	103.637	Glutinous	Intermediate	2	Group II	0.207	0.792	0.002
UNE34	Nahng Sa-ahd	17640	Upland rice	Northeastern	Prasat	Surin	14.6188	103.424	Non-glutinous	Indica I	1	Group I	0.989	0.008	0.003
UNE35	San-pah-tawng	17648	Upland rice	Northeastern	Kaset Wisai	Roi Et	15.4888	103.543	Glutinous	Indica I	1	Group I	0.64	0.359	0.001
UNE36	Gam	17679	Upland rice	Northeastern	Nong Ruea	Khon Kaen	16.4867	102.412	Glutinous	Indica II	2	Group II	0.018	0.981	0.002
UNE37	Hahng Moo	17683	Upland rice	Northeastern	Khukhan	Sisaket	14.7234	104.192	Non-glutinous	Indica I	1	Group I	0.96	0.039	0.001
UNE38	Pawng-aew	20281	Upland rice	Northeastern	Phimai	Nakhon Ratchasima	15.3906	102.625	Non-glutinous	Indica II	2	Group II	0.007	0.992	0.002
UNE39	Dawk Pra-doo	20282	Upland rice	Northeastern	Phimai	Nakhon Ratchasima	15.3215	102.561	Non-glutinous	Indica II	2	Group II	0.003	0.995	0.002
UNE40	E-leuang	20283	Upland rice	Northeastern	Phimai	Nakhon Ratchasima	15.1657	102.487	Glutinous	Indica II	2	Group II	0.317	0.676	0.007
UNE42	Khao' Sao	21696	Upland rice	Northeastern	Wang Saphung	Loei	17.3039	101.57	Glutinous	Indica II	2	Group II	0.003	0.995	0.002
UNE46	Khao Tood Ngawn	22718	Upland rice	Northeastern	Thep Sathit	Chaiyaphum	15.5642	101.456	Non-glutinous	Japonica II	3	Group III	0.002	0.001	0.997
UNE47	Pah Sew	22724	Upland rice	Northeastern	Mueang	Udon Thani	17.5031	102.754	Glutinous	Indica II	2	Group II	0.012	0.986	0.002
UNE50	Long Nah	22809	Upland rice	Northeastern	Mueang	Loei	17.5099	101.745	Glutinous	Japonica I	3	Group III	0.001	0.002	0.997
US01	Dawk Hawm	1911	Upland rice	Southern	Mueang	Nakhon Si Thammarat	8.48867	99.9698	Non-glutinous	Indica II	2	Group II	0.333	0.645	0.022
US02	Sai	1931	Upland rice	Southern	Khuan Khanun	Phatthalung	7.74966	99.9691	Non-glutinous	Indica I	1	Group I	0.909	0.003	0.088
US03	Dawk Pa-yawm	1947	Upland rice	Southern	Khuan Khanun	Phatthalung	7.76082	100.058	Non-glutinous	Indica I	1	Group I	0.984	0.01	0.006
US05	Leb Nok	11131	Upland rice	Southern	Mueang	Phang Nga	8.46293	98.4894	Non-glutinous	Japonica II	3	Group III	0.001	0.001	0.998
US06	Jaek	12637	Upland rice	Southern	Chana	Songkhla	6.8887	100.689	Non-glutinous	Indica I	1	Group I	0.996	0.003	0.001
US07	Yah Maw	12763	Upland rice	Southern	Thepha	Songkhla	6.7113	100.952	Non-glutinous	Indica I	1	Group I	0.996	0.003	0.001
US08	Yah Yaw	12764	Upland rice	Southern	Sathing Phra	Songkhla	7.58876	100.386	Non-glutinous	Indica I	1	Group I	0.995	0.004	0.001
US09	Jeu Lah Ngaw	12810	Upland rice	Southern	Nong Chik	Pattani	6.71984	101.241	Non-glutinous	Indica I	1	Group I	0.986	0.009	0.005
US10	Leuang	12811	Upland rice	Southern	Thepha	Songkhla	6.88321	100.815	Non-glutinous	Indica I	1	Group I	0.982	0.017	0.002
US11	Soo Pawng Ming	12813	Upland rice	Southern	Nong Chik	Pattani	6.74477	101.218	Non-glutinous	Indica I	1	Group I	0.981	0.017	0.002
US12	Nahng Mui Dawk Khaek	12815	Upland rice	Southern	Sathing Phra	Songkhla	7.54001	100.406	Non-glutinous	Indica I	1	Group I	0.995	0.004	0.002
US13	Hawm	12817	Upland rice	Southern	Mueang	Yala	6.57825	101.174	Non-glutinous	Indica I	1	Group I	0.984	0.014	0.002
US14	Feun Din	12818	Upland rice	Southern	Khok Pho	Pattani	6.75233	101.134	Non-glutinous	Indica I	1	Group I	0.995	0.004	0.002
US15	Pah Chae	12823	Upland rice	Southern	Mueang	Yala	6.56691	101.194	Non-glutinous	Indica I	1	Group I	0.994	0.005	0.001
US18	Ah-naw Mah Daw	12852	Upland rice	Southern	Nong Chik	Pattani	6.74447	101.207	Non-glutinous	Indica I	1	Group I	0.997	0.002	0.001
US19	Seu Rah	12854	Upland rice	Southern	Mueang	Yala	6.55241	101.21	Non-glutinous	Indica I	1	Group I	0.996	0.003	0.001
US20	Yah-bo-ji-naw	12856	Upland rice	Southern	Mueang	Yala	6.64245	101.284	Non-glutinous	Indica I	1	Group I	0.996	0.003	0.001
US21	Maw-mi-ngeng	12866	Upland rice	Southern	Nong Chik	Pattani	6.78202	101.218	Non-glutinous	Indica I	1	Group I	0.997	0.002	0.001
US22	Leuang	12872	Upland rice	Southern	Khok Pho	Pattani	6.77922	101.104	Non-glutinous	Indica I	1	Group I	0.993	0.006	0.001
US23	Bow Leuang	14330	Upland rice	Southern	Mueang	Phatthalung	7.46122	100.178	Non-glutinous	Japonica II	3	Group III	0.001	0.001	0.998
US24	Buk Yah	14363	Upland rice	Southern	Mueang	Phatthalung	7.44305	100.197	Non-glutinous	Japonica II	3	Group III	0.002	0.001	0.997
US25	Khiaw	15524	Upland rice	Southern	La-un	Ranong	10.0868	98.7863	Non-glutinous	Indica I	1	Group I	0.998	0.002	0.001
US26	Jae-San	15536	Upland rice	Southern	Takua Pa	Phang Nga	8.819	98.2935	Non-glutinous	Indica I	1	Group I	0.996	0.003	0.001
US27	Dawk Prao	15727	Upland rice	Southern	Na Mom	Songkhla	6.97503	100.565	Non-glutinous	Indica I	1	Group I	0.996	0.003	0.001
US28	Yah Lam Pae	15775	Upland rice	Southern	Yi-ngo	Narathiwat	6.57915	101.65	Non-glutinous	Indica I	1	Group I	0.993	0.006	0.001
US29	Yi-tae-sah-ming	15789	Upland rice	Southern	Bacho	Narathiwat	6.50837	101.654	Non-glutinous	Indica I	1	Group I	0.996	0.003	0.001
US30	Dawk Pud	16461	Upland rice	Southern	Mueang	Pattani	6.83462	101.256	Non-glutinous	Indica I	1	Group I	0.998	0.001	0.001
US31	Dawk Mud	16691	Upland rice	Southern	Mueang	Satun	6.68399	100.058	Non-glutinous	Indica I	1	Group I	0.996	0.003	0.001
US32	Bow Ti	17655	Upland rice	Southern	Mueang	Satun	6.73196	100.056	Non-glutinous	Indica I	1	Group I	0.996	0.003	0.001
US33	An-li-bah-bah	17764	Upland rice	Southern	Mueang	Satun	6.71007	100.057	Non-glutinous	Indica I	1	Group I	0.993	0.006	0.001
US34	Pae-nae	19248	Upland rice	Southern	Mueang	Phatthalung	7.50445	100.043	Non-glutinous	Indica I	1	Group I	0.997	0.003	0.001
US35	Nahng Rang	19271	Upland rice	Southern	Mueang	Phatthalung	7.62272	100.062	Non-glutinous	Indica I	1	Group I	0.995	0.003	0.002
US36	Niaw Sai Mai	19543	Upland rice	Southern	Thai Mueang	Phang Nga	8.33588	98.2828	Glutinous	Japonica II	3	Group III	0.001	0.001	0.999
US37	Khao Mah-lay	20348	Upland rice	Southern	Mueang	Pattani	6.83581	101.283	Non-glutinous	Indica I	1	Group I	0.993	0.005	0.001
US38	Khao Rai	23795	Upland rice	Southern	Wiang Sa	Surat Thani	8.59924	99.3275	Non-glutinous	Japonica II	3	Group III	0.009	0.005	0.986
US39	Khem Ngern Rai	23798	Upland rice	Southern	Khian Sa	Surat Thani	8.69623	99.1251	Non-glutinous	Japonica II	3	Group III	0.001	0.001	0.998
US40	Niaw Peuang Dam	23810	Upland rice	Southern	Na Thawi	Songkhla	6.77393	100.68	Glutinous	Japonica II	3	Group III	0.001	0.001	0.998
US41	Niaw Dam	23813	Upland rice	Southern	Na Thawi	Songkhla	6.77273	100.697	Glutinous	Japonica II	3	Group III	0.001	0.001	0.998
US42	Niaw Daeng	23819	Upland rice	Southern	Na Thawi	Songkhla	6.77351	100.697	Glutinous	Japonica II	3	Group III	0.002	0.019	0.98
US43	Niaw Dam Peuang Khao	23837	Upland rice	Southern	Mueang	Phatthalung	7.63271	100.111	Glutinous	Japonica II	3	Group III	0.001	0.001	0.998
US44	Dam Nok Lah	23840	Upland rice	Southern	Mueang	Trang	7.57054	99.5398	Glutinous	Japonica II	3	Group III	0.001	0.001	0.998
US47	Dawk Pa-yawm Rai	23846	Upland rice	Southern	Mueang	Trang	7.61796	99.4912	Non-glutinous	Japonica II	3	Group III	0.001	0.001	0.998
US48	Dawk Pa-yawm	23856	Upland rice	Southern	Wang Wiset	Trang	7.68312	99.4866	Non-glutinous	Japonica II	3	Group III	0.001	0.001	0.998
US49	Niaw Rai	23859	Upland rice	Southern	Wang Wiset	Trang	7.67555	99.4484	Glutinous	Japonica II	3	Group III	0.001	0.001	0.998
US50	Leb Nok Rai	23860	Upland rice	Southern	Wang Wiset	Trang	7.63608	99.475	Non-glutinous	Indica I	1	Group I	0.995	0.003	0.002
