# Supplementary material
Source: MDPI journal article supplement (https://www.mdpi.com/2073-4395/11/5/995)

Figure S2: Allele frequency of the 75 SNP markers in each geographical population

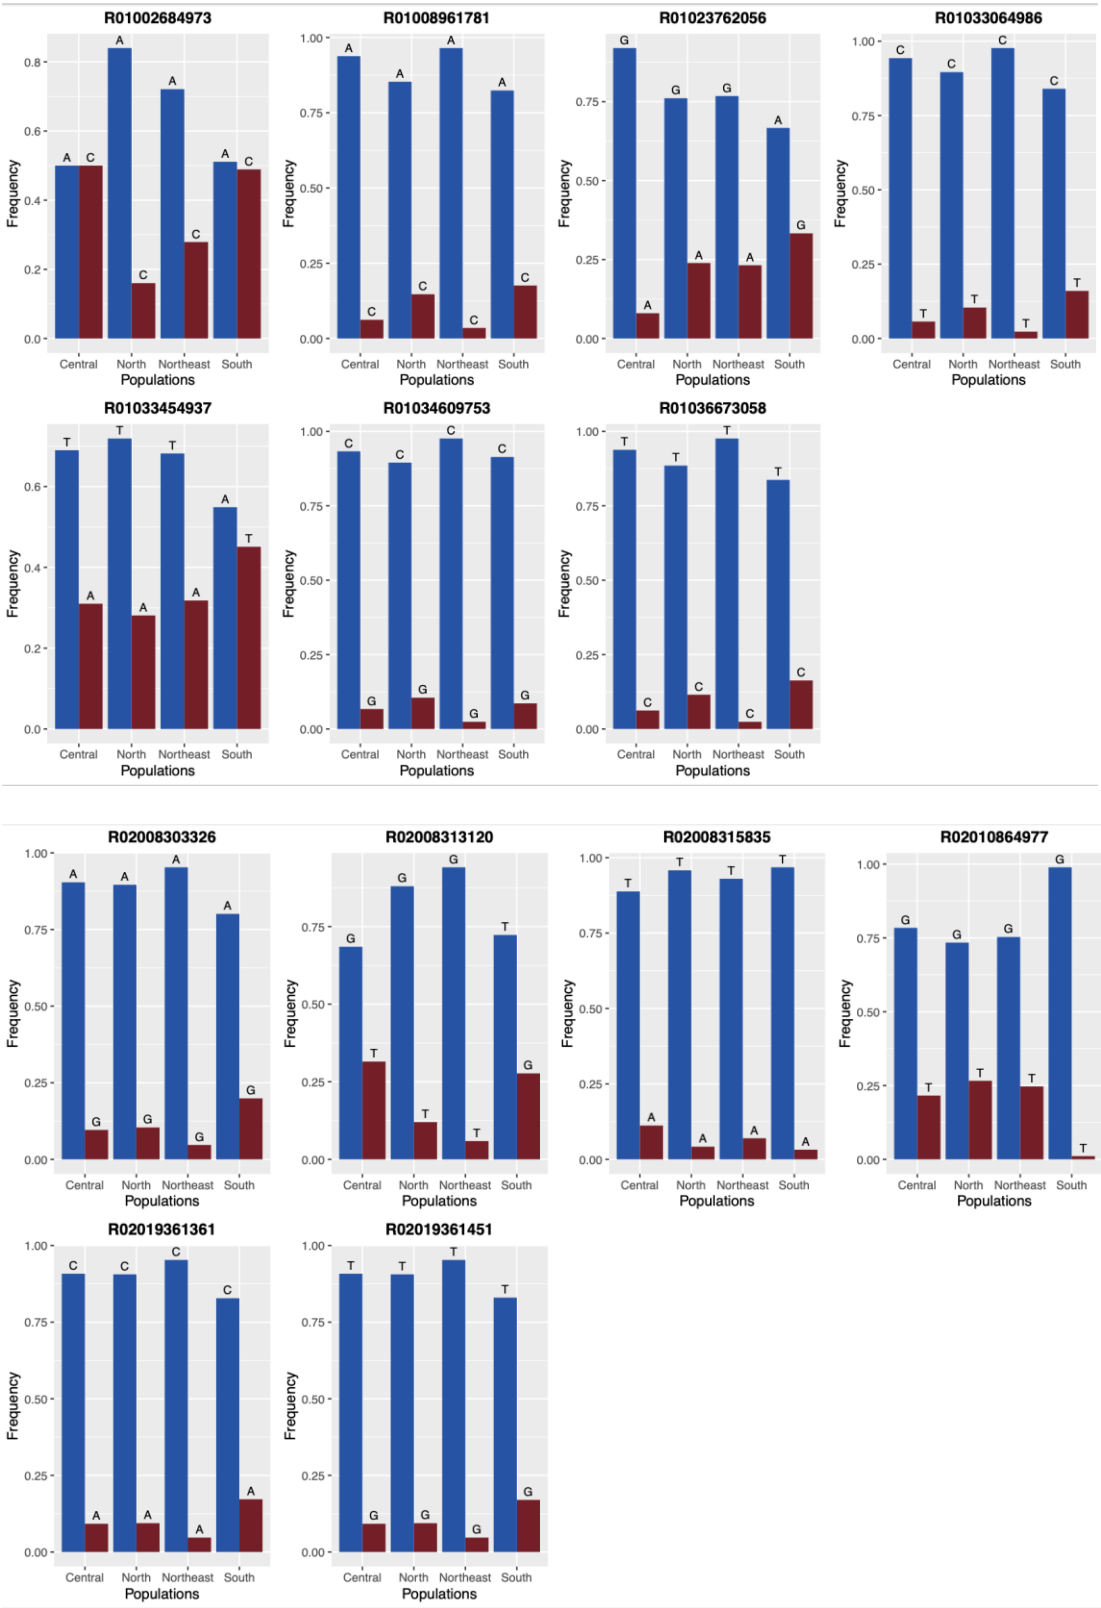

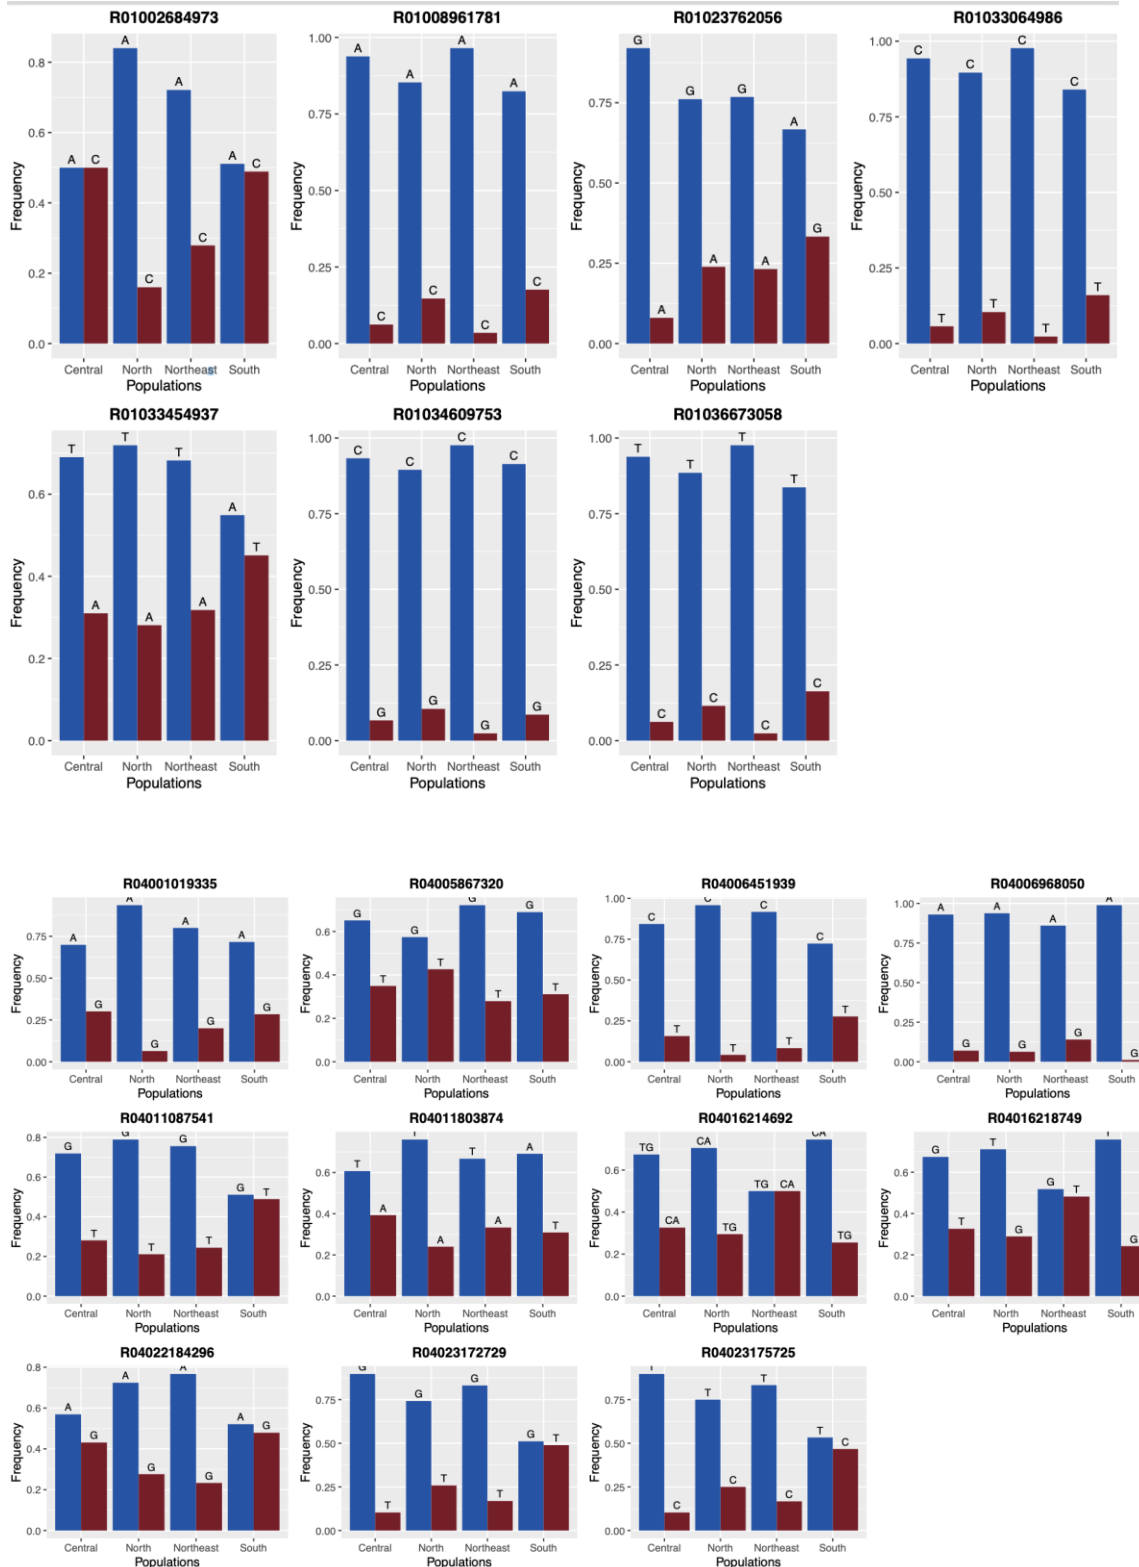

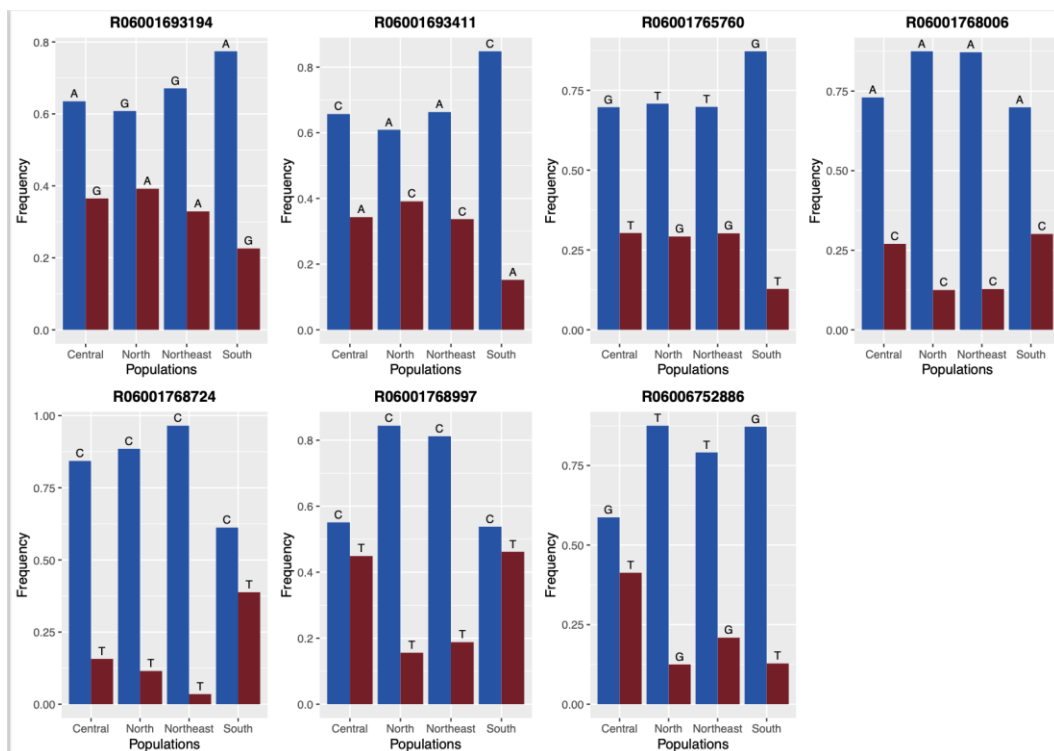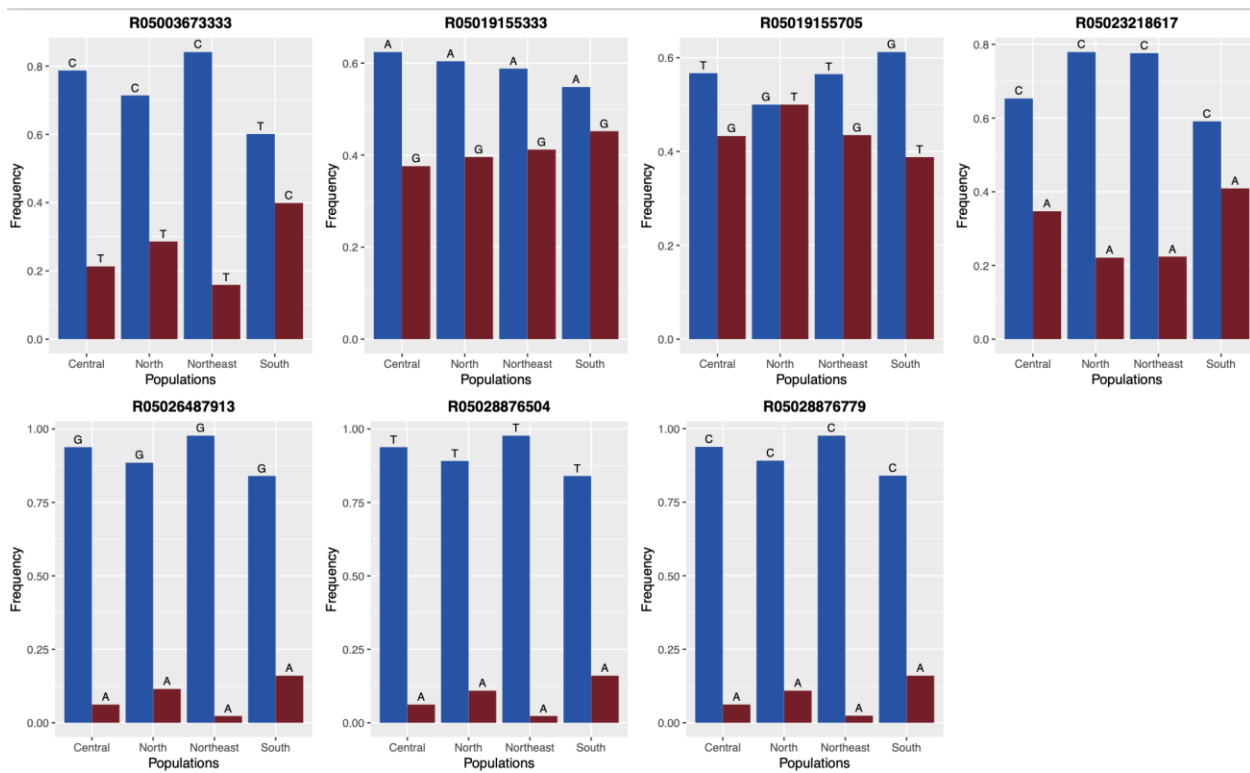

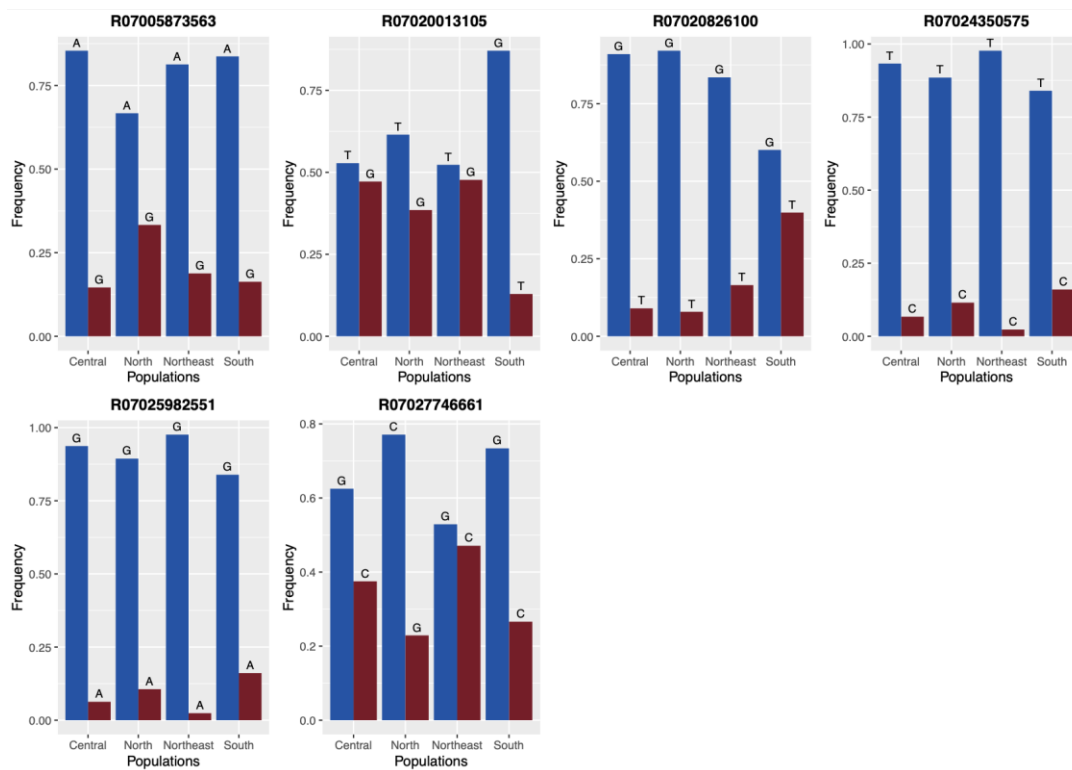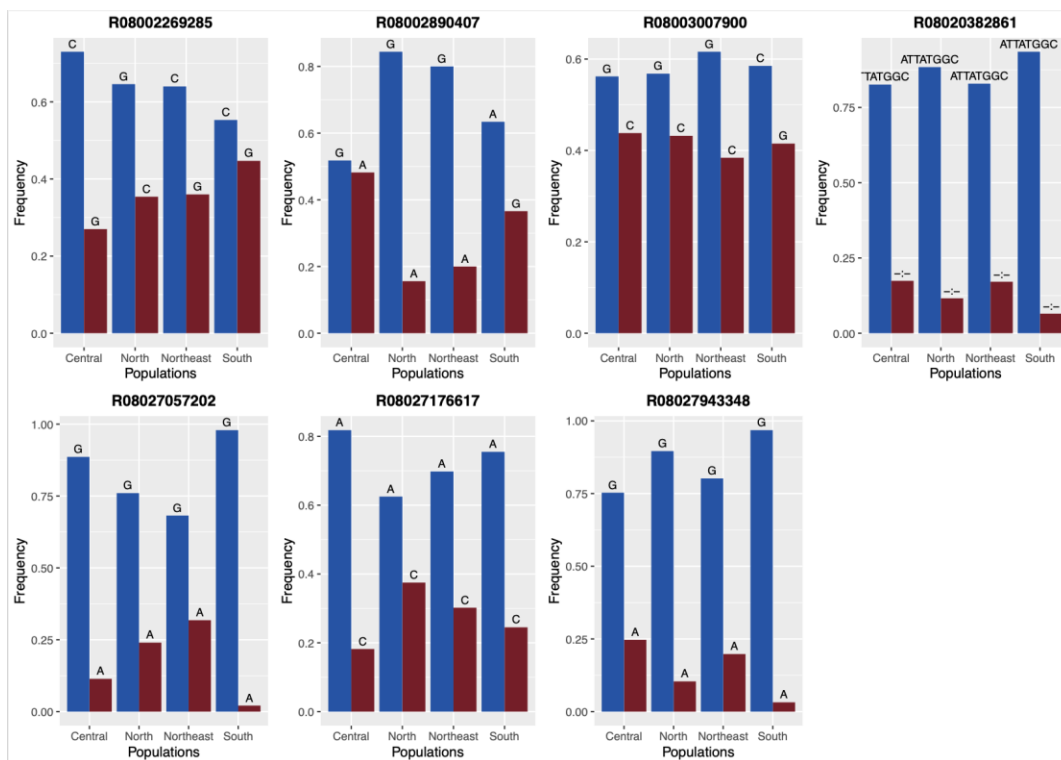

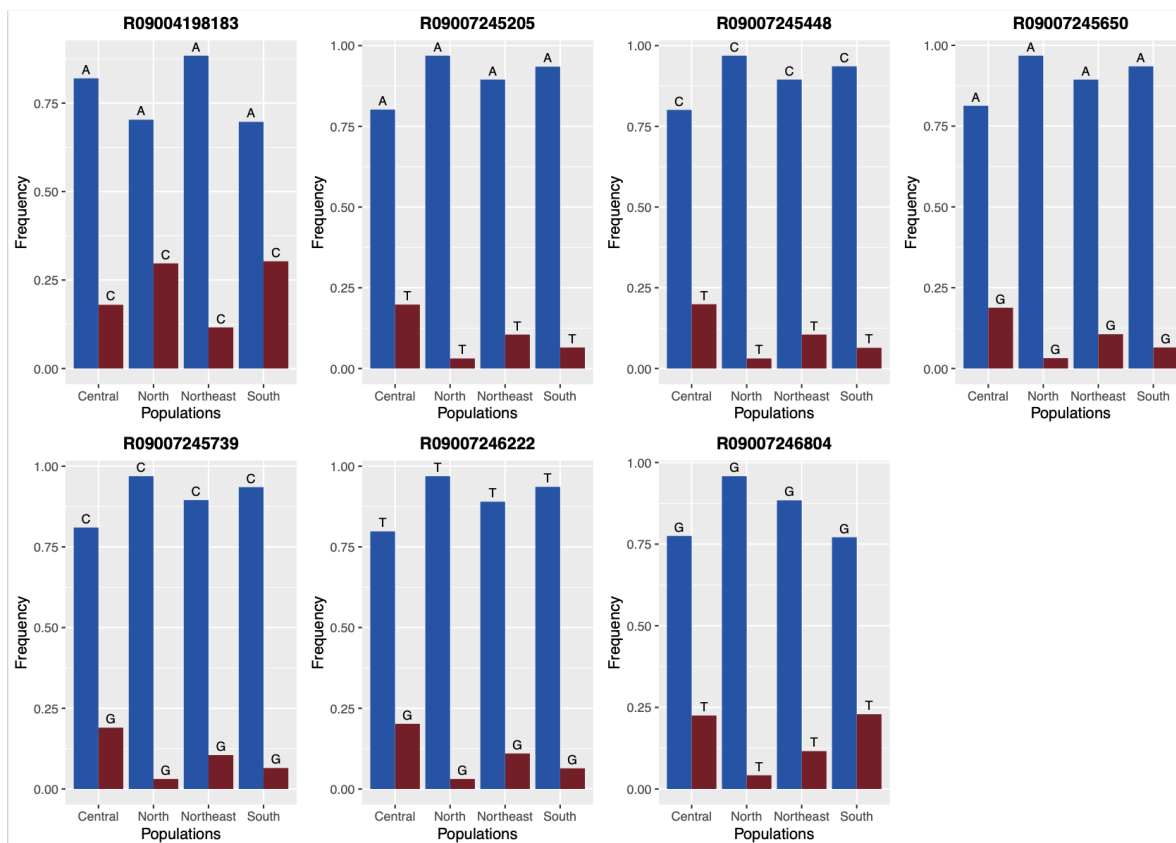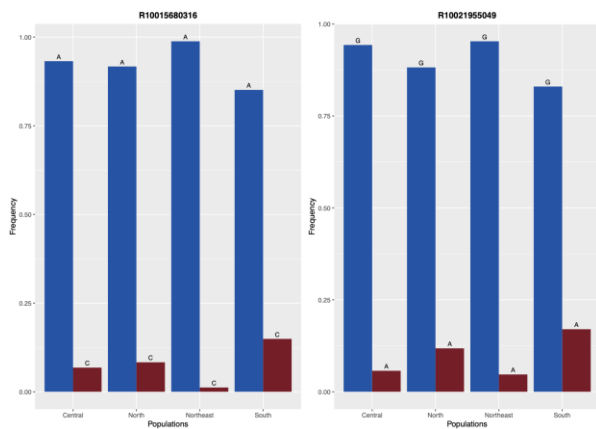

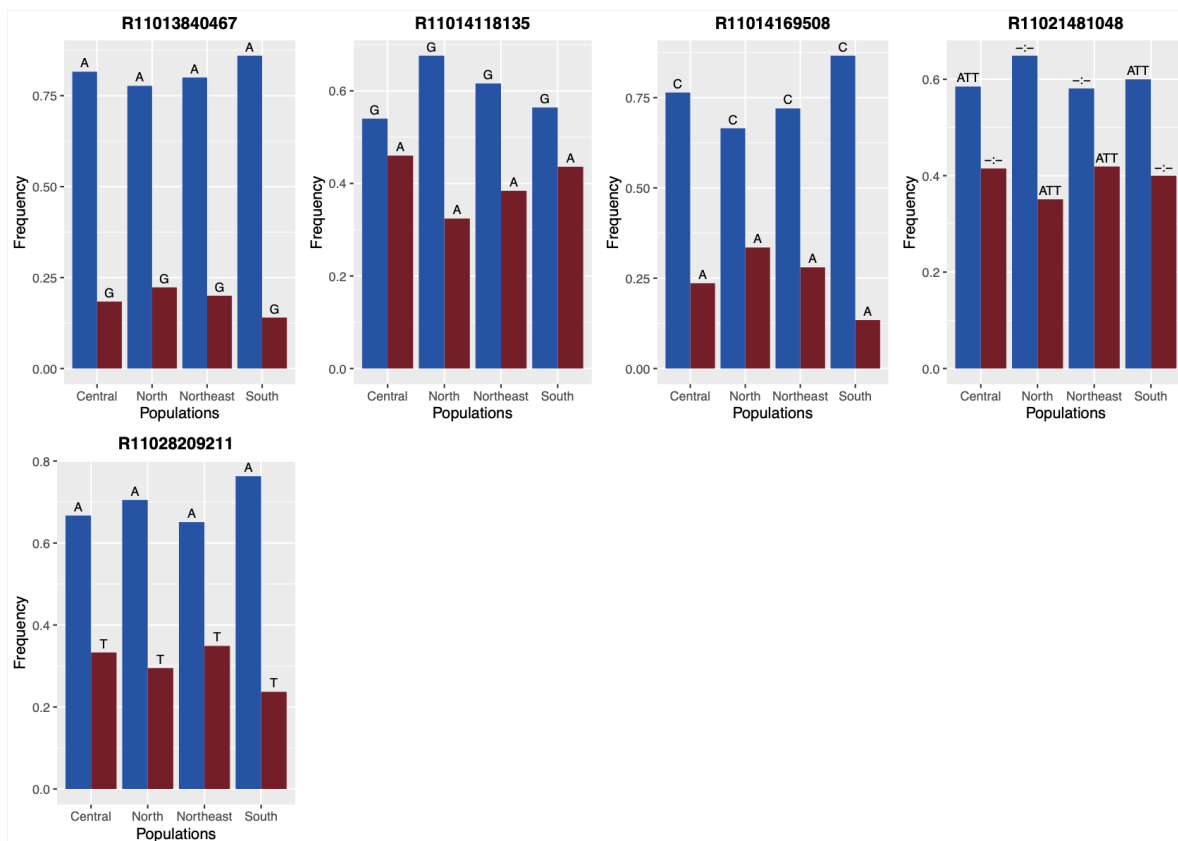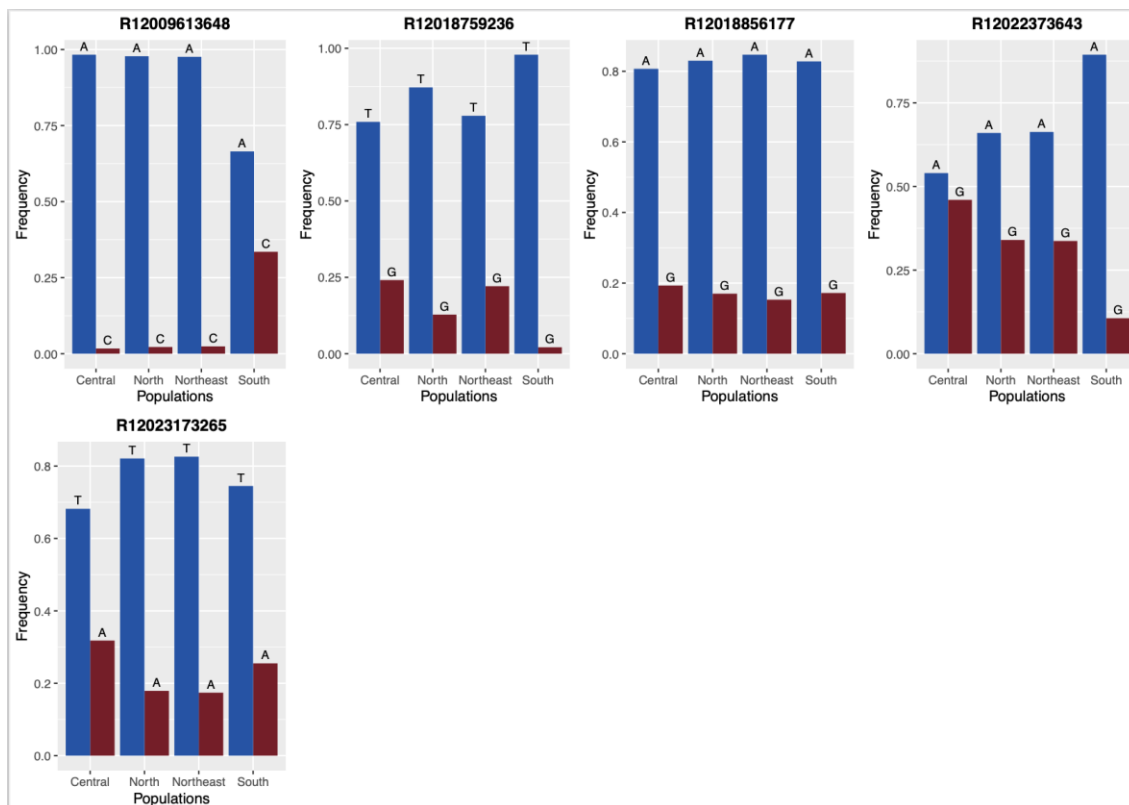

Supplement: s1 [file s1 › Figure S2 - allele frequency.pdf]
